# Supplementary material for: Metabolic Profiling, Antiviral Activity and the Microbiome of Some Mauritian Soft Corals
Source: MDPI journal article supplement (doi:10.3390/md21110574), 2023-10-31

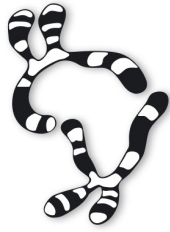

inqaba biotec™

*Africa's Genomics Company*

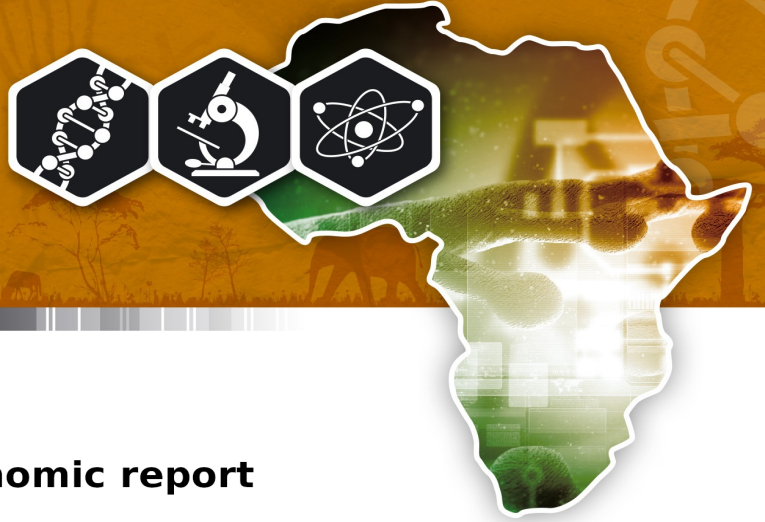

## inqaba biotec metagenomic report

### Sample Information

|              |                          |
|--------------|--------------------------|
| Index:       | S3                       |
| Sample Name: | SF2                      |
| Run Name:    | 230508                   |
| Report Date: | Thu May 11 08:40:49 2023 |

This report contains the summarized metagenomic analysis of 16s/ITS1F gene sequencing. Samples were sequenced on an illumina system ([www.illumina.com](http://www.illumina.com)). Reads were processed through usearch (<https://drive5.com/usearch>) and taxonomic information was determined based on the Ribosomal Database Project's (<http://rdp.cme.msu.edu/index.jsp>) 16s database v16 or in the case of ITS1F, the RDP ITS V2 database. Operational Taxonomic Units (OTUs) contributing less than 1% of the total data have been excluded Report generation command used :  
\$create\_vsearch\_single\_sample\_pdf\_report\_illumina.py KT-SF2\_S3.merged.filt.otu.table.tsv S3 SF2 230508 16s

Taxanomical Classification

Kingdom Classification

| Kingdom  | Read Count | %     |
|----------|------------|-------|
| Bacteria | 77959.0    | 99.97 |
| Archaea  | 26.0       | 0.03  |

Top Kingdom Classification

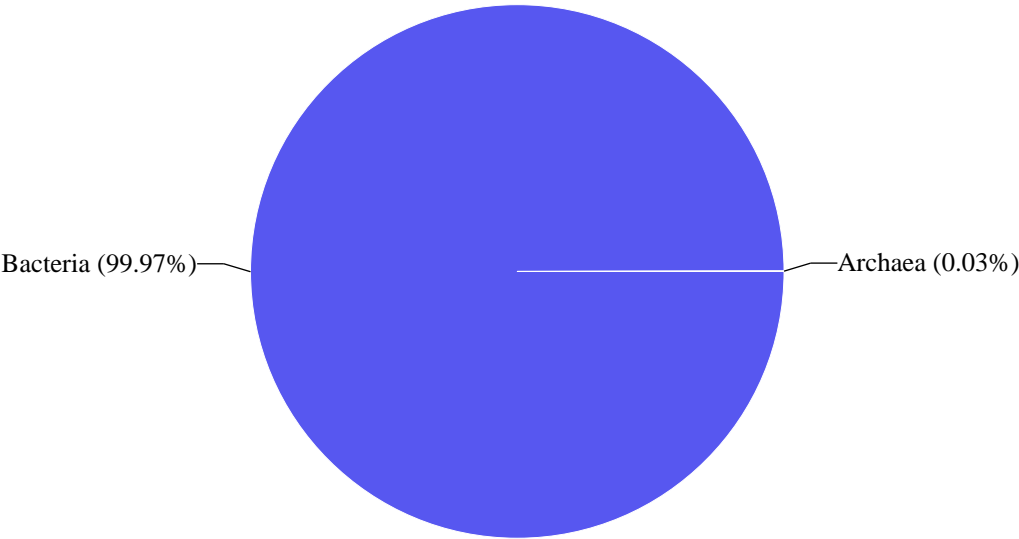

Phylum Classification

| Phyla Classification | Read Count | %     |
|----------------------|------------|-------|
| Unknown              | 35484.0    | 45.51 |
| Spirochaetes         | 18456.0    | 23.67 |
| Proteobacteria       | 14683.0    | 18.83 |
| Firmicutes           | 4049.0     | 5.19  |
| Planctomycetes       | 1546.0     | 1.98  |
| Actinobacteria       | 1539.0     | 1.97  |
| Bacteroidetes        | 776.0      | 1.00  |
| Cyanobacteria        | 708.0      | 0.91  |
| Verrucomicrobia      | 235.0      | 0.30  |
| Chloroflexi          | 207.0      | 0.27  |
| Acidobacteria        | 69.0       | 0.09  |
| Lentisphaerae        | 51.0       | 0.07  |
| Fusobacteria         | 33.0       | 0.04  |
| SBR1093              | 28.0       | 0.04  |
| Euryarchaeota        | 25.0       | 0.03  |
|                      | 24.0       | 0.03  |
| WWE1                 | 22.0       | 0.03  |
| TM7                  | 18.0       | 0.02  |
| Gemmatimonadetes     | 11.0       | 0.01  |

Top Phylum Classification

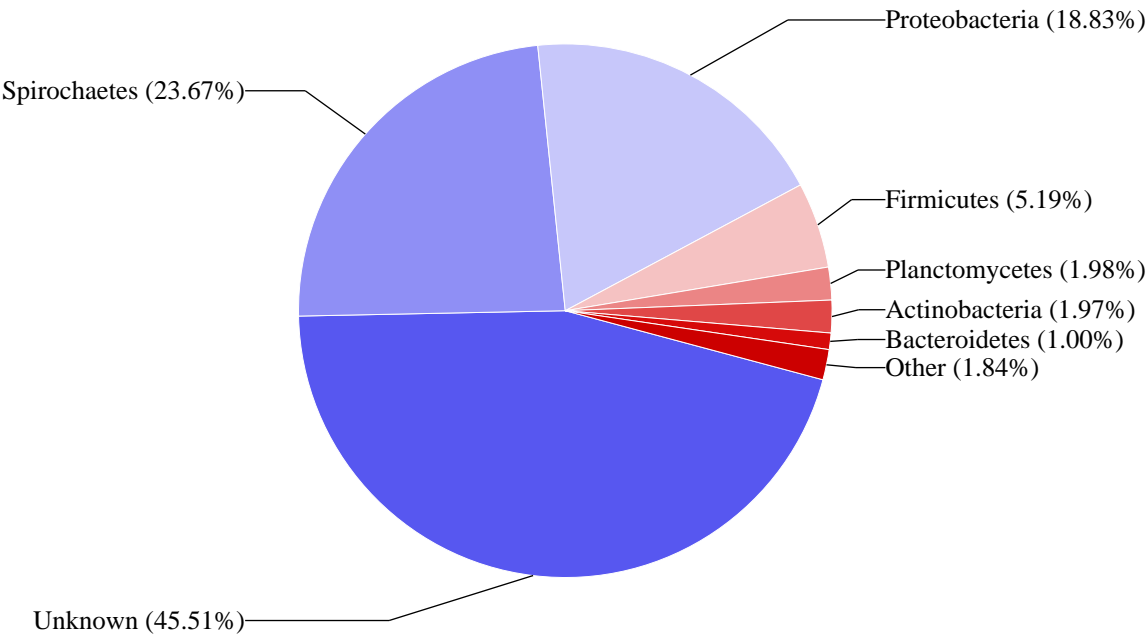

**Class Classification**

| Class                     | Read Count | %     |
|---------------------------|------------|-------|
| Unknown                   | 35767.0    | 45.89 |
| Spirochaetes              | 18456.0    | 23.68 |
| Gammaproteobacteria       | 12600.0    | 16.17 |
| Bacilli                   | 3395.0     | 4.36  |
| Alphaproteobacteria       | 1727.0     | 2.22  |
| Actinobacteria            | 1201.0     | 1.54  |
| Planctomycetia            | 1094.0     | 1.40  |
| Clostridia                | 643.0      | 0.82  |
| Flavobacteriia            | 384.0      | 0.49  |
|                           | 356.0      | 0.46  |
| Oscillatoriothymonadaceae | 346.0      | 0.44  |
| OM190                     | 223.0      | 0.29  |
| Deltaproteobacteria       | 218.0      | 0.28  |
| Phycisphaerae             | 188.0      | 0.24  |
| Verrucomicrobiae          | 183.0      | 0.23  |
| Acidimicrobiia            | 175.0      | 0.22  |
| Synechococcophycideae     | 148.0      | 0.19  |
| Thermomicrobia            | 122.0      | 0.16  |
| Bacteroidia               | 108.0      | 0.14  |
| Anaerolineae              | 83.0       | 0.11  |
| Betaproteobacteria        | 69.0       | 0.09  |
| Thermoleophilia           | 66.0       | 0.08  |
| Coriobacteriia            | 57.0       | 0.07  |
| Cytophagia                | 48.0       | 0.06  |
| Opitutae                  | 42.0       | 0.05  |
| Fusobacteriia             | 33.0       | 0.04  |
| Sva0725                   | 26.0       | 0.03  |
| Gloeobacterophycideae     | 24.0       | 0.03  |
| Halobacteria              | 22.0       | 0.03  |
| Acidobacteria             | 19.0       | 0.02  |
| EC214                     | 19.0       | 0.02  |
| TM7                       | 18.0       | 0.02  |
| Rubrobacteria             | 16.0       | 0.02  |
| Gemmatimonadetes          | 11.0       | 0.01  |
| vadinHA49                 | 11.0       | 0.01  |
| TA18                      | 10.0       | 0.01  |
| BME43                     | 10.0       | 0.01  |
| VHS                       | 9.0        | 0.01  |
| Pla3                      | 9.0        | 0.01  |

|              |     |      |
|--------------|-----|------|
| Solibacteres | 8.0 | 0.01 |
|--------------|-----|------|

Top Class Classification

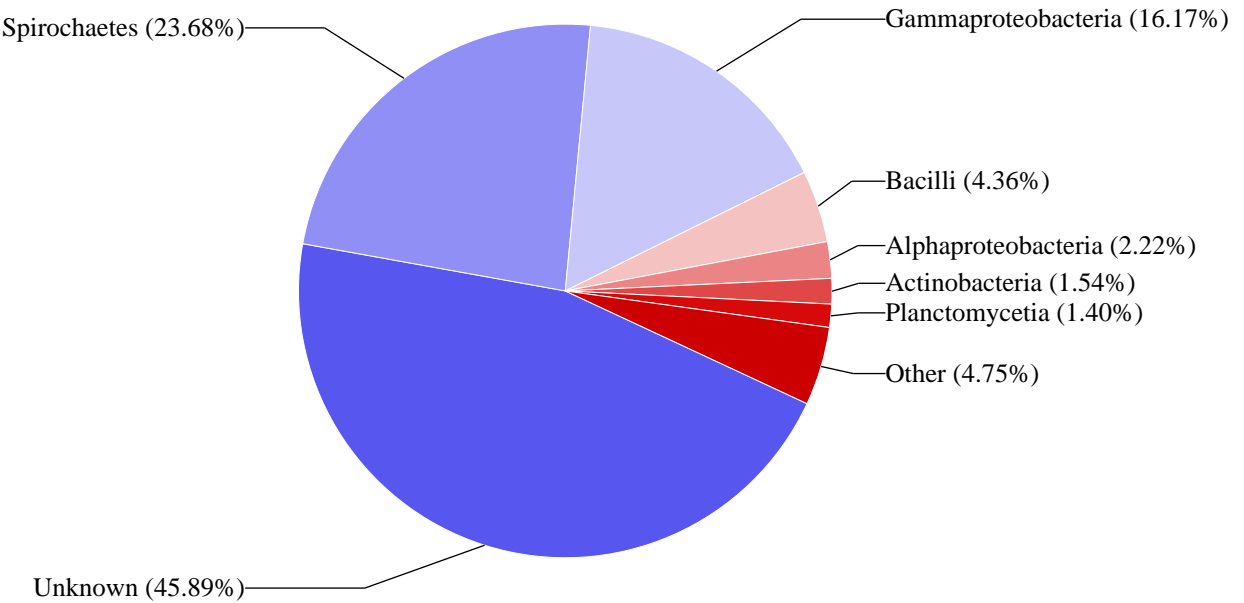

## Order Classification

| Order              | Read Count | %     |
|--------------------|------------|-------|
| Unknown            | 36645.0    | 47.04 |
| Spirochaetales     | 18449.0    | 23.68 |
| Oceanospirillales  | 11459.0    | 14.71 |
| Lactobacillales    | 3137.0     | 4.03  |
| Actinomycetales    | 1168.0     | 1.50  |
| Pirellulales       | 1039.0     | 1.33  |
| Clostridiales      | 638.0      | 0.82  |
| Rhodobacterales    | 557.0      | 0.72  |
|                    | 408.0      | 0.52  |
| Flavobacteriales   | 384.0      | 0.49  |
| Rhodospirillales   | 360.0      | 0.46  |
| Sphingomonadales   | 264.0      | 0.34  |
| Oscillatoriales    | 232.0      | 0.30  |
| Rhizobiales        | 232.0      | 0.30  |
| Alteromonadales    | 192.0      | 0.25  |
| Verrucomicrobiales | 183.0      | 0.23  |
| Acidimicrobiales   | 175.0      | 0.22  |
| Phycisphaerales    | 174.0      | 0.22  |
| Bacillales         | 163.0      | 0.21  |
| CL500              | 149.0      | 0.19  |
| Pseudomonadales    | 128.0      | 0.16  |
| Chroococcales      | 111.0      | 0.14  |
| Bacteroidales      | 108.0      | 0.14  |
| Thiotrichales      | 105.0      | 0.13  |
| Myxococcales       | 105.0      | 0.13  |
| Pseudanabaenales   | 96.0       | 0.12  |
| Enterobacteriales  | 91.0       | 0.12  |
| agg27              | 74.0       | 0.09  |
| Coriobacteriales   | 57.0       | 0.07  |
| Vibrionales        | 56.0       | 0.07  |
| Z20                | 51.0       | 0.07  |
| Cytophagales       | 48.0       | 0.06  |
| Gaiellales         | 47.0       | 0.06  |
| Planctomycetales   | 46.0       | 0.06  |
| Xanthomonadales    | 44.0       | 0.06  |
| Kiloniellales      | 43.0       | 0.06  |
| Synechococcales    | 38.0       | 0.05  |
| Caldilineales      | 38.0       | 0.05  |
| NB1                | 36.0       | 0.05  |

|                     |      |      |
|---------------------|------|------|
| SBR1031             | 35.0 | 0.04 |
| Burkholderiales     | 35.0 | 0.04 |
| Fusobacteriales     | 33.0 | 0.04 |
| Puniceococcales     | 32.0 | 0.04 |
| Bifidobacteriales   | 31.0 | 0.04 |
| HOC36               | 27.0 | 0.03 |
| Sva0725             | 26.0 | 0.03 |
| Gloeobacterales     | 24.0 | 0.03 |
| Methylophilales     | 22.0 | 0.03 |
| Halobacteriales     | 22.0 | 0.03 |
| Thiohalorhabdales   | 20.0 | 0.03 |
| BD7                 | 19.0 | 0.02 |
| HTCC2188            | 19.0 | 0.02 |
| Desulfobacterales   | 19.0 | 0.02 |
| Solirubrobacterales | 19.0 | 0.02 |
| Rubrobacterales     | 16.0 | 0.02 |
| JG30                | 14.0 | 0.02 |
| Chromatiales        | 14.0 | 0.02 |
| RB41                | 13.0 | 0.02 |
| iii1                | 12.0 | 0.02 |
| Kordiimonadales     | 11.0 | 0.01 |
| Gemmatimonadales    | 11.0 | 0.01 |
| Bdellovibrionales   | 11.0 | 0.01 |
| Salinisphaerales    | 11.0 | 0.01 |
| DH61                | 11.0 | 0.01 |
| CCM11a              | 10.0 | 0.01 |
| Caulobacterales     | 9.0  | 0.01 |
| I025                | 9.0  | 0.01 |
| Spirobacillales     | 9.0  | 0.01 |
| Neisseriales        | 8.0  | 0.01 |
| Solibacterales      | 8.0  | 0.01 |
| Gemmatales          | 8.0  | 0.01 |

## Top Order Classification

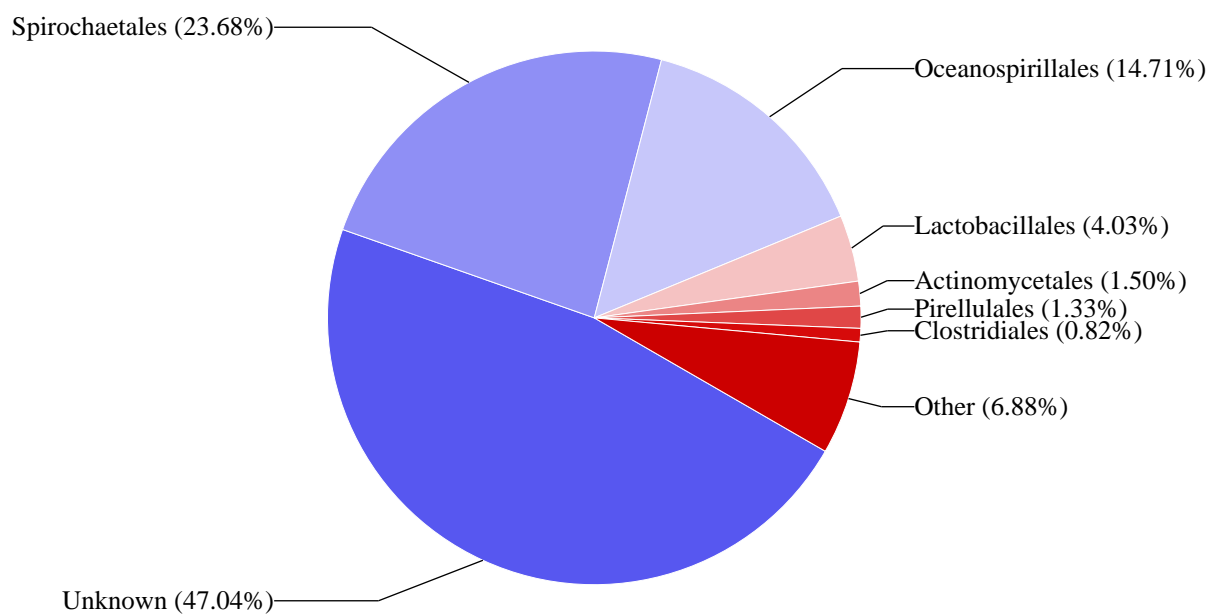



## Family Classification

| Family               | Read Count | %     |
|----------------------|------------|-------|
| Unknown              | 38852.0    | 49.90 |
| Spirochaetaceae      | 18449.0    | 23.70 |
| Endozoicimonaceae    | 11454.0    | 14.71 |
| Lactobacillaceae     | 1769.0     | 2.27  |
| Pirellulaceae        | 1039.0     | 1.33  |
| Streptococcaceae     | 680.0      | 0.87  |
| Rhodobacteraceae     | 530.0      | 0.68  |
| Flavobacteriaceae    | 356.0      | 0.46  |
| Ruminococcaceae      | 347.0      | 0.45  |
| Acetobacteraceae     | 320.0      | 0.41  |
| Sphingomonadaceae    | 236.0      | 0.30  |
| Phormidiaceae        | 232.0      | 0.30  |
| Actinosynnemataceae  | 204.0      | 0.26  |
| Verrucomicrobiaceae  | 183.0      | 0.24  |
| Methylobacteriaceae  | 174.0      | 0.22  |
| Saprospiraceae       | 143.0      | 0.18  |
| Corynebacteriaceae   | 125.0      | 0.16  |
| Piscirickettsiaceae  | 105.0      | 0.13  |
| Pseudanabaenaceae    | 96.0       | 0.12  |
| Propionibacteriaceae | 96.0       | 0.12  |
| OM60                 | 96.0       | 0.12  |
| Actinomycetaceae     | 95.0       | 0.12  |
| Enterobacteriaceae   | 91.0       | 0.12  |
| Lachnospiraceae      | 91.0       | 0.12  |
| Micrococcaceae       | 76.0       | 0.10  |
| Bacillaceae          | 72.0       | 0.09  |
| Leuconostocaceae     | 70.0       | 0.09  |
| Pseudomonadaceae     | 70.0       | 0.09  |
| Xenococcaceae        | 65.0       | 0.08  |
| C111                 | 58.0       | 0.07  |
| Moraxellaceae        | 58.0       | 0.07  |
| Coriobacteriaceae    | 57.0       | 0.07  |
| Phycisphaeraceae     | 53.0       | 0.07  |
| Microbacteriaceae    | 52.0       | 0.07  |
| Alteromonadaceae     | 52.0       | 0.07  |
| Nocardioidaceae      | 51.0       | 0.07  |
| R4                   | 51.0       | 0.07  |
| wb1_P06              | 50.0       | 0.06  |
| Enterococcaceae      | 48.0       | 0.06  |

|                       |      |      |
|-----------------------|------|------|
| Vibrionaceae          | 47.0 | 0.06 |
| Planctomycetaceae     | 46.0 | 0.06 |
| Clostridiaceae        | 44.0 | 0.06 |
| Kineosporiaceae       | 44.0 | 0.06 |
| Xanthomonadaceae      | 44.0 | 0.06 |
| Gaiellaceae           | 41.0 | 0.05 |
| Acaryochloridaceae    | 38.0 | 0.05 |
| Caldilineaceae        | 38.0 | 0.05 |
| A4b                   | 35.0 | 0.04 |
| Comamonadaceae        | 35.0 | 0.04 |
| Prevotellaceae        | 34.0 | 0.04 |
| Veillonellaceae       | 34.0 | 0.04 |
| Fusobacteriaceae      | 33.0 | 0.04 |
| Puniceicoccaceae      | 32.0 | 0.04 |
| Bifidobacteriaceae    | 31.0 | 0.04 |
| Staphylococcaceae     | 31.0 | 0.04 |
| Haliangiaceae         | 30.0 | 0.04 |
| JdFBGBact             | 24.0 | 0.03 |
| Gloeobacteraceae      | 24.0 | 0.03 |
| Phyllobacteriaceae    | 23.0 | 0.03 |
| Rhodospirillaceae     | 22.0 | 0.03 |
| Methylophilaceae      | 22.0 | 0.03 |
| Halobacteriaceae      | 22.0 | 0.03 |
| Streptomycetaceae     | 22.0 | 0.03 |
| Hyphomonadaceae       | 20.0 | 0.03 |
| Bacteroidaceae        | 20.0 | 0.03 |
| Cryomorphaceae        | 20.0 | 0.03 |
| Desulfobulbaceae      | 19.0 | 0.02 |
| OM27                  | 19.0 | 0.02 |
| Intrasporangiaceae    | 19.0 | 0.02 |
| Flammeovirgaceae      | 18.0 | 0.02 |
| Geodermatophilaceae   | 17.0 | 0.02 |
| JTB38                 | 16.0 | 0.02 |
| Pseudonocardiaceae    | 16.0 | 0.02 |
| Rubrobacteraceae      | 16.0 | 0.02 |
| Brevibacteriaceae     | 15.0 | 0.02 |
| HTCC2089              | 15.0 | 0.02 |
| Erythrobacteraceae    | 15.0 | 0.02 |
| Dermabacteraceae      | 13.0 | 0.02 |
| Ellin6075             | 13.0 | 0.02 |
| Peptostreptococcaceae | 13.0 | 0.02 |
| Carnobacteriaceae     | 13.0 | 0.02 |
| Hyphomicrobiaceae     | 12.0 | 0.02 |

|                    |      |      |
|--------------------|------|------|
| Cytophagaceae      | 12.0 | 0.02 |
| Bacteriovoracaceae | 11.0 | 0.01 |
| Salinisphaeraceae  | 11.0 | 0.01 |
| Nannocystaceae     | 10.0 | 0.01 |
| Caulobacteraceae   | 9.0  | 0.01 |
| Paenibacillaceae   | 9.0  | 0.01 |
| Cyanobacteriaceae  | 9.0  | 0.01 |
| Porphyromonadaceae | 9.0  | 0.01 |
| mb2424             | 9.0  | 0.01 |
| Neisseriaceae      | 8.0  | 0.01 |
| Gemmataceae        | 8.0  | 0.01 |

Top Family Classification

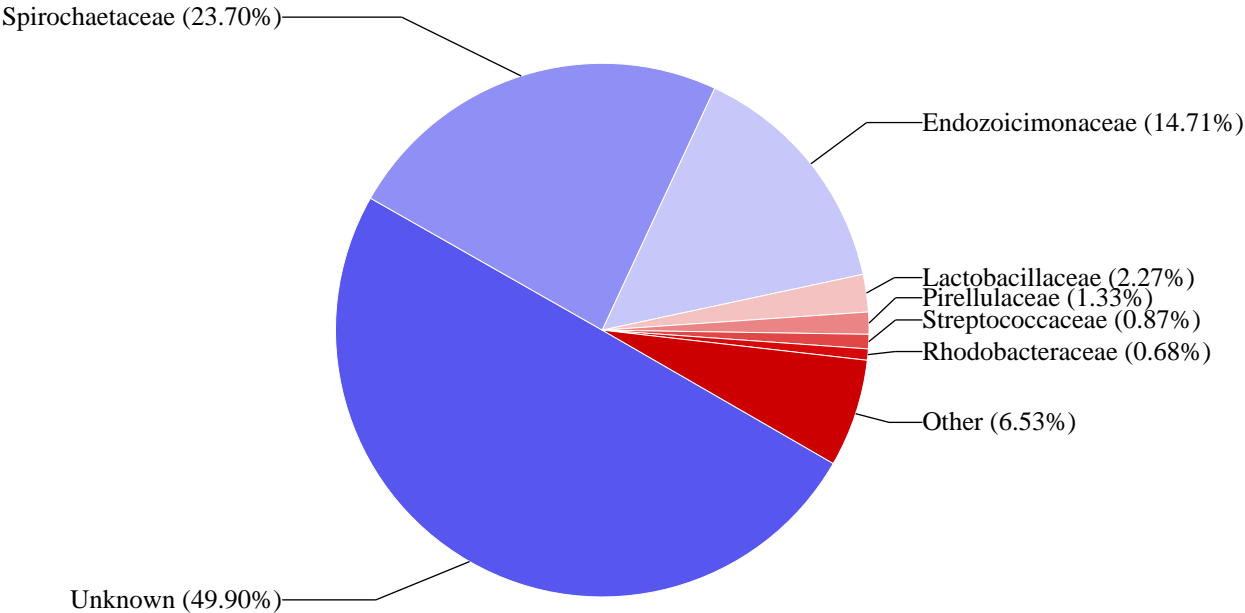

## Genus Classification

| Genus             | Read Count | %     |
|-------------------|------------|-------|
| Unknown           | 52744.0    | 67.87 |
| Spirochaeta       | 18443.0    | 23.73 |
| Endozoicomonas    | 1763.0     | 2.27  |
| Lactobacillus     | 1207.0     | 1.55  |
| Streptococcus     | 665.0      | 0.86  |
| Acetobacter       | 221.0      | 0.28  |
| Sphingomonas      | 204.0      | 0.26  |
| Methylobacterium  | 174.0      | 0.22  |
| Lyngbya           | 166.0      | 0.21  |
| Ruminococcus      | 130.0      | 0.17  |
| Corynebacterium   | 125.0      | 0.16  |
| Ethanoligenens    | 96.0       | 0.12  |
| Propionibacterium | 94.0       | 0.12  |
| Planctomycete     | 93.0       | 0.12  |
| planctomycete     | 89.0       | 0.11  |
| Ruegeria          | 64.0       | 0.08  |
| Muricauda         | 62.0       | 0.08  |
| Weissella         | 56.0       | 0.07  |
| Micrococcus       | 55.0       | 0.07  |
| Ascidianibacter   | 48.0       | 0.06  |
| Rubritalea        | 48.0       | 0.06  |
| Planctomyces      | 46.0       | 0.06  |
| Pediococcus       | 44.0       | 0.06  |
| Clostridium       | 44.0       | 0.06  |
| Haliea            | 43.0       | 0.06  |
| Enterococcus      | 43.0       | 0.06  |
| Acinetobacter     | 41.0       | 0.05  |
| Nocardioides      | 35.0       | 0.05  |
| Xenococcus        | 35.0       | 0.05  |
| Prevotella        | 34.0       | 0.04  |
| Staphylococcus    | 33.0       | 0.04  |
| Propionigenium    | 32.0       | 0.04  |
| Coralimargarita   | 32.0       | 0.04  |
| Kineococcus       | 31.0       | 0.04  |
| Collinsella       | 29.0       | 0.04  |
| Croceitalea       | 26.0       | 0.03  |
| Congregibacter    | 26.0       | 0.03  |
| Halomicronema     | 24.0       | 0.03  |
| Gloeobacter       | 24.0       | 0.03  |
| Halococcus        | 22.0       | 0.03  |
| Pseudomonas       | 21.0       | 0.03  |

|                   |      |      |
|-------------------|------|------|
| Acaryochloris     | 21.0 | 0.03 |
| Hoeflea           | 19.0 | 0.02 |
| Streptomyces      | 19.0 | 0.02 |
| Haloferula        | 17.0 | 0.02 |
| Bifidobacterium   | 16.0 | 0.02 |
| Rubrobacter       | 16.0 | 0.02 |
| Brevibacterium    | 15.0 | 0.02 |
| Microbacterium    | 15.0 | 0.02 |
| Psychrobacter     | 15.0 | 0.02 |
| Xanthomonas       | 14.0 | 0.02 |
| Ilumatobacter     | 13.0 | 0.02 |
| Bacillus          | 13.0 | 0.02 |
| Alteromonas       | 13.0 | 0.02 |
| Shimia            | 13.0 | 0.02 |
| Isobaculum        | 13.0 | 0.02 |
| Coccinimonas      | 12.0 | 0.02 |
| Bacteroides       | 12.0 | 0.02 |
| Fluviicola        | 12.0 | 0.02 |
| Geodermatophilus  | 12.0 | 0.02 |
| Winogradskyella   | 12.0 | 0.02 |
| Hydrocoleum       | 12.0 | 0.02 |
| Staniera          | 12.0 | 0.02 |
| Succiniclasicum   | 12.0 | 0.02 |
| Persicobacter     | 12.0 | 0.02 |
| Skermanella       | 11.0 | 0.01 |
| Salinisphaera     | 11.0 | 0.01 |
| SC3               | 11.0 | 0.01 |
| Adlercreutzia     | 11.0 | 0.01 |
| Actinomycetospira | 10.0 | 0.01 |
| Psychroserpens    | 10.0 | 0.01 |
| Lysobacter        | 10.0 | 0.01 |
| Plesiocystis      | 10.0 | 0.01 |
| Candidatus        | 10.0 | 0.01 |
| Tenacibaculum     | 10.0 | 0.01 |
| A17               | 9.0  | 0.01 |
| Dysgonomonas      | 9.0  | 0.01 |
| Rhodopirellula    | 9.0  | 0.01 |
| Rubellimicrobium  | 9.0  | 0.01 |
| Agreia            | 8.0  | 0.01 |
| Marmoricola       | 8.0  | 0.01 |

### Top Genus Classification

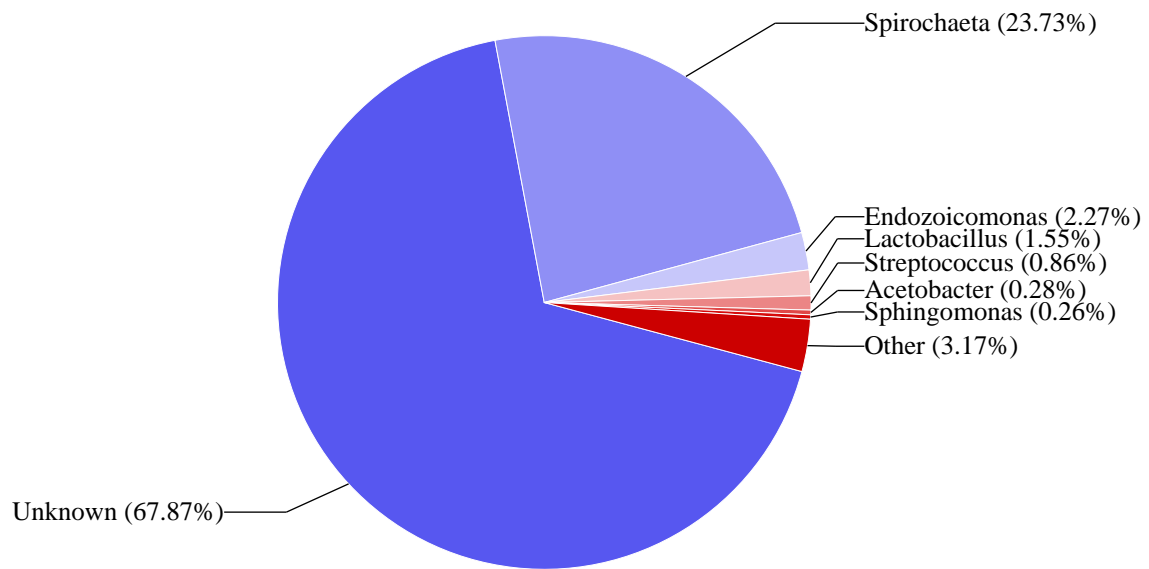

## Species Classification

| Species                      | Read Count | %     |
|------------------------------|------------|-------|
| Unknown                      | 54619.0    | 70.33 |
| Spirochaeta_                 | 18384.0    | 23.67 |
| Unknown_                     | 2339.0     | 3.01  |
| Lactobacillus_mucosae        | 725.0      | 0.93  |
| Ruminococcus_                | 130.0      | 0.17  |
| Lactobacillus_paraplanarum   | 113.0      | 0.15  |
| Ethanoligenens_              | 96.0       | 0.12  |
| Planctomycete_LF1            | 93.0       | 0.12  |
| Corynebacterium_             | 65.0       | 0.08  |
| Lactobacillus_manihotivorans | 55.0       | 0.07  |
| Ascidianibacter_aurantiacus  | 48.0       | 0.06  |
| Rubritalea_                  | 48.0       | 0.06  |
| Planctomyces_                | 46.0       | 0.06  |
| Propionibacterium_acnes      | 43.0       | 0.06  |
| Halieta_mediterranea         | 43.0       | 0.06  |
| planctomycete_MS1399         | 42.0       | 0.05  |
| Muricauda_olearia            | 39.0       | 0.05  |
| Xenococcus_                  | 35.0       | 0.05  |
| Micrococcus_                 | 35.0       | 0.05  |
| Prevotella_                  | 33.0       | 0.04  |
| Propionigenium_              | 32.0       | 0.04  |
| Lactobacillus_               | 32.0       | 0.04  |
| Coralimargarita_             | 32.0       | 0.04  |
| Streptococcus_equi           | 31.0       | 0.04  |
| Kineococcus_                 | 30.0       | 0.04  |
| Congregibacter_              | 26.0       | 0.03  |
| Collinsella_stercoris        | 26.0       | 0.03  |
| Halomicronema_               | 24.0       | 0.03  |
| Gloeobacter_                 | 24.0       | 0.03  |
| Acaryochloris_               | 21.0       | 0.03  |
| Halococcus_                  | 19.0       | 0.02  |
| Croceitalea_dokdonensis      | 18.0       | 0.02  |
| Clostridium_tyrobutyricum    | 17.0       | 0.02  |
| Rubrobacter_                 | 16.0       | 0.02  |
| Ilumatobacter_fluminis       | 13.0       | 0.02  |
| Muricauda_                   | 13.0       | 0.02  |
| Isobaculum_melis             | 13.0       | 0.02  |
| Coccinimonas_marina          | 12.0       | 0.02  |
| Fluviicola_                  | 12.0       | 0.02  |

|                         |      |      |
|-------------------------|------|------|
| Alteromonas_macleodii   | 12.0 | 0.02 |
| Geodermatophilus_       | 12.0 | 0.02 |
| Staniera_cyanosphaera   | 12.0 | 0.02 |
| Succinoclasticum_       | 12.0 | 0.02 |
| Clostridium_ruminantium | 12.0 | 0.02 |
| Persicobacter_diffluens | 12.0 | 0.02 |
| Bacteroides_            | 11.0 | 0.01 |
| Skermanella_            | 11.0 | 0.01 |
| Salinisphaera_          | 11.0 | 0.01 |
| SC3_                    | 11.0 | 0.01 |
| Adlercreutzia_          | 11.0 | 0.01 |
| Plesiocystis_           | 10.0 | 0.01 |
| Candidatus_             | 10.0 | 0.01 |
| Bifidobacterium_        | 10.0 | 0.01 |
| A17_                    | 9.0  | 0.01 |
| Rhodopirellula_baltica  | 9.0  | 0.01 |
| Rubellimicrobium_       | 9.0  | 0.01 |
| Brevibacterium_casei    | 8.0  | 0.01 |
| Lactobacillus_hamsteri  | 8.0  | 0.01 |
| Acetobacter_aceti       | 8.0  | 0.01 |
| Agreia_pratensis        | 8.0  | 0.01 |
| Marmoricola_aurantiacus | 8.0  | 0.01 |

Top Species Classification

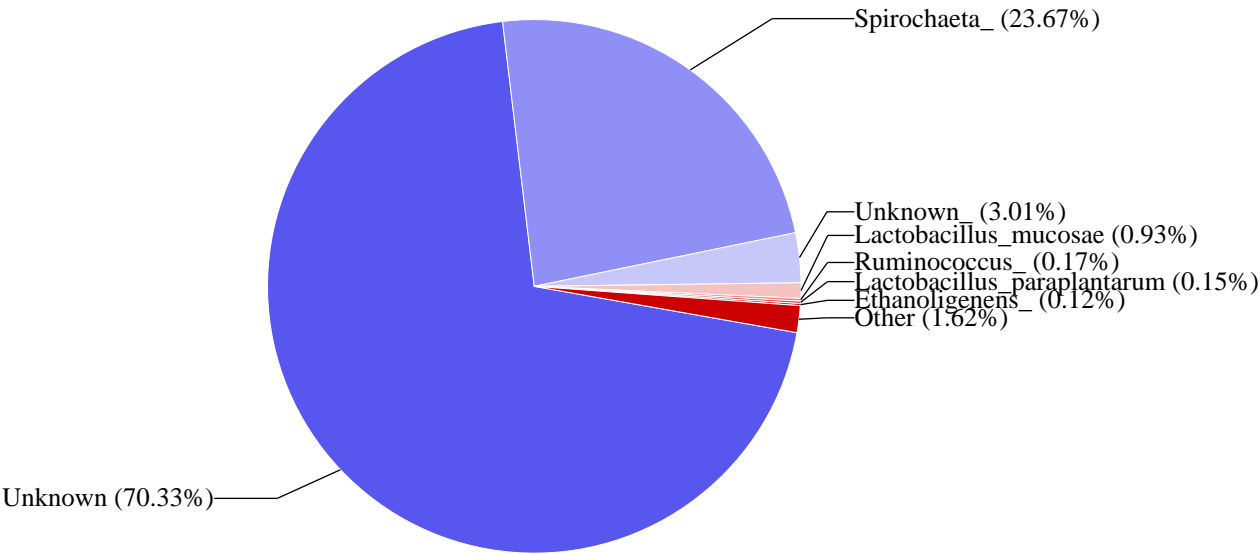

Supplement: s1 [file s1]
