# Supplementary material for: Metabolic Profiling, Antiviral Activity and the Microbiome of Some Mauritian Soft Corals
Source: MDPI journal article supplement (doi:10.3390/md21110574), 2023-10-31
Supplement: s1 [file s1]

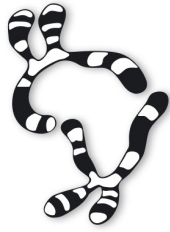

inqaba biotec™

Africa's Genomics Company

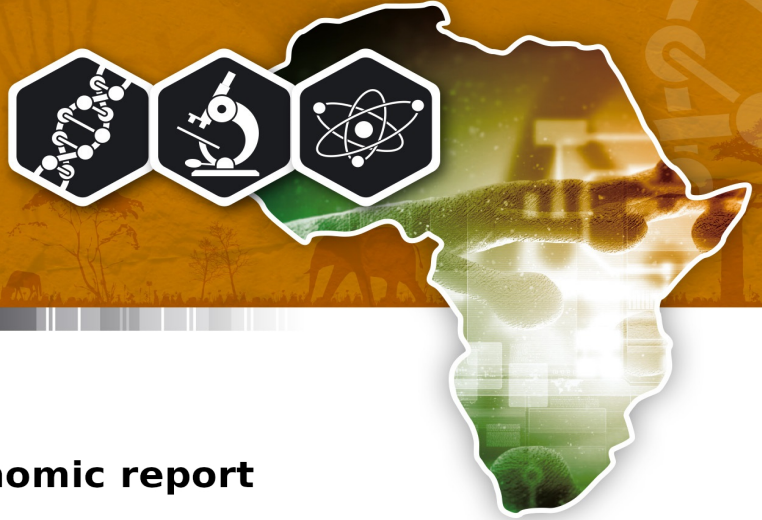

## inqaba biotec metagenomic report

### Sample Information

|              |                          |
|--------------|--------------------------|
| Index:       | S5                       |
| Sample Name: | FF1                      |
| Run Name:    | 230508                   |
| Report Date: | Thu May 11 08:38:03 2023 |

This report contains the summarized metagenomic analysis of 16s/ITS1F gene sequencing. Samples were sequenced on an illumina system ([www.illumina.com](http://www.illumina.com)). Reads were processed through usearch (<https://drive5.com/usearch>) and taxonomic information was determined based on the Ribosomal Database Project's (<http://rdp.cme.msu.edu/index.jsp>) 16s database v16 or in the case of ITS1F, the RDP ITS V2 database. Operational Taxonomic Units (OTUs) contributing less than 1% of the total data have been excluded Report generation command used :  
\$create\_vsearch\_single\_sample\_pdf\_report\_illumina.py KT-FF1\_S5.merged.filt.otu.table.tsv S5 FF1 230508 16s

Taxanomical Classification

Kingdom Classification

| Kingdom  | Read Count | %      |
|----------|------------|--------|
| Bacteria | 100652.0   | 100.00 |

Top Kingdom Classification

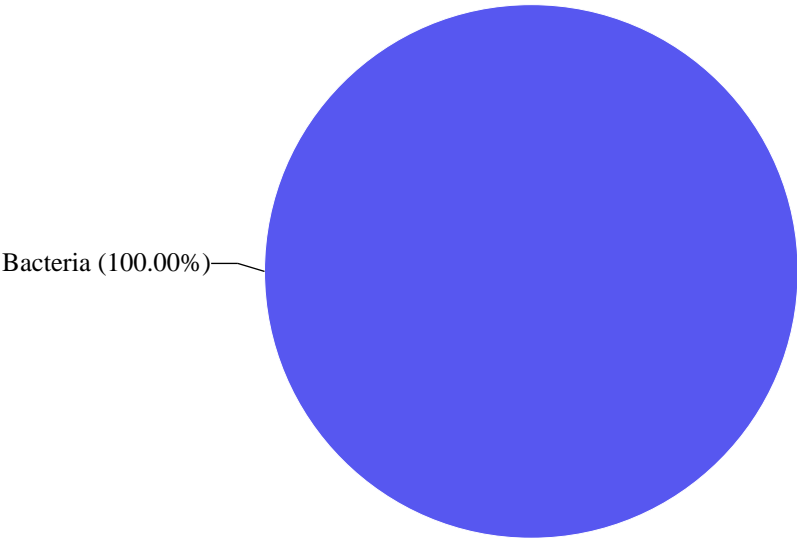

Phylum Classification

| Phyla Classification | Read Count | %     |
|----------------------|------------|-------|
| Unknown              | 97150.0    | 96.52 |
| Proteobacteria       | 2803.0     | 2.78  |
| Actinobacteria       | 370.0      | 0.37  |
| Firmicutes           | 127.0      | 0.13  |
| Bacteroidetes        | 57.0       | 0.06  |
| Tenericutes          | 44.0       | 0.04  |
| Acidobacteria        | 42.0       | 0.04  |
| Planctomycetes       | 37.0       | 0.04  |
| Cyanobacteria        | 27.0       | 0.03  |

Top Phylum Classification

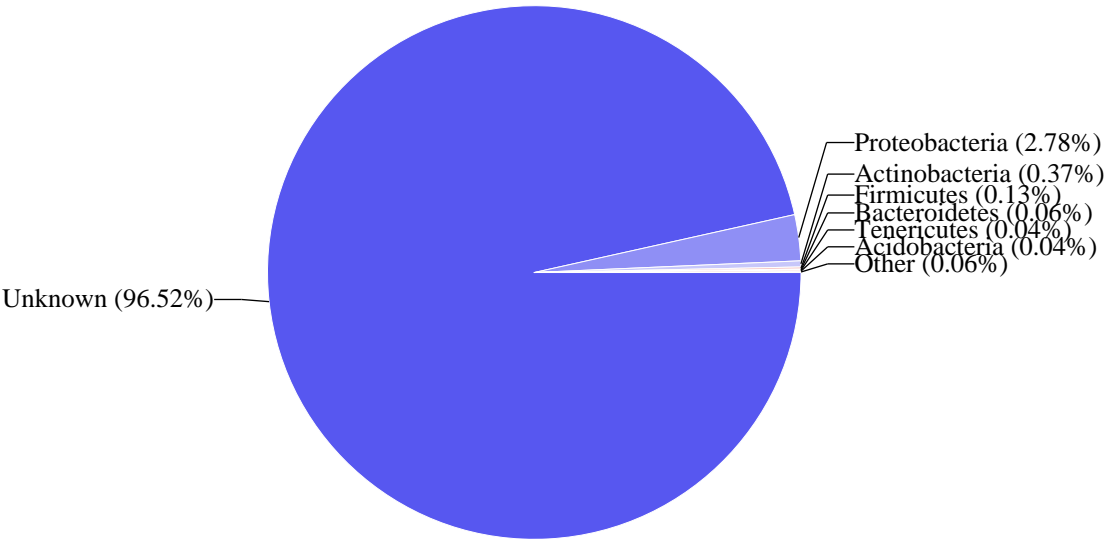

Class Classification

| Class               | Read Count | %     |
|---------------------|------------|-------|
| Unknown             | 97169.0    | 96.56 |
| Alphaproteobacteria | 2563.0     | 2.55  |
| Actinobacteria      | 370.0      | 0.37  |
| Gammaproteobacteria | 176.0      | 0.17  |
| Bacilli             | 86.0       | 0.09  |
| Betaproteobacteria  | 58.0       | 0.06  |
| Mollicutes          | 44.0       | 0.04  |
| Clostridia          | 40.0       | 0.04  |
| Planctomycetia      | 37.0       | 0.04  |
| Bacteroidia         | 28.0       | 0.03  |
| Acidobacteria       | 27.0       | 0.03  |
| Flavobacteriia      | 25.0       | 0.02  |
| Sva0725             | 11.0       | 0.01  |

Top Class Classification

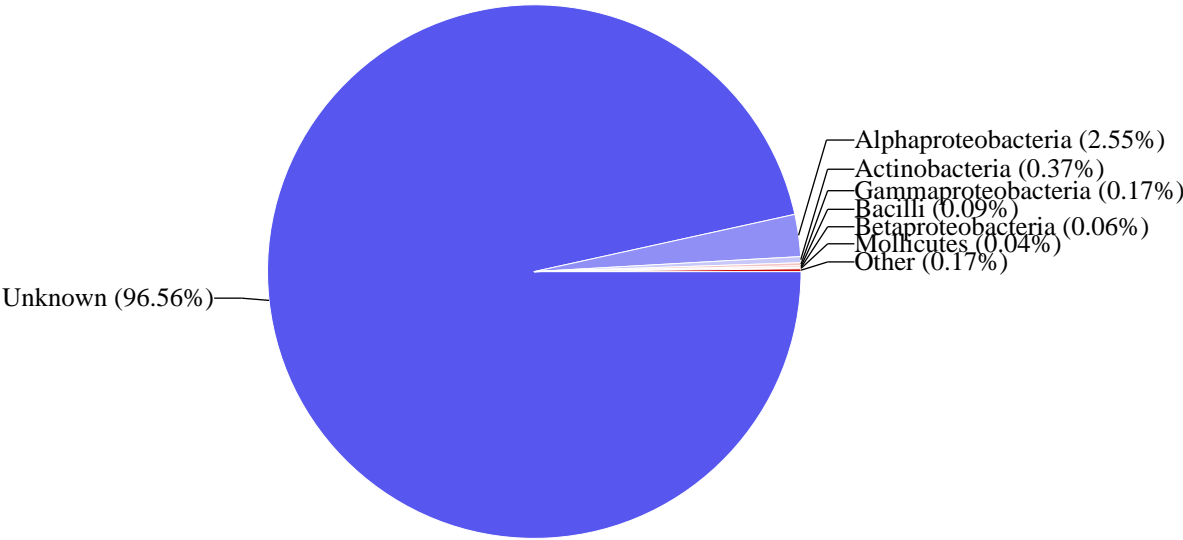

Order Classification

| Order             | Read Count | %     |
|-------------------|------------|-------|
| Unknown           | 98940.0    | 98.33 |
| Sphingomonadales  | 404.0      | 0.40  |
| Actinomycetales   | 370.0      | 0.37  |
| Rhizobiales       | 322.0      | 0.32  |
| Pseudomonadales   | 73.0       | 0.07  |
| Lactobacillales   | 65.0       | 0.06  |
| Oceanospirillales | 48.0       | 0.05  |
| Anaeroplasmatales | 44.0       | 0.04  |
| Burkholderiales   | 40.0       | 0.04  |
|                   | 36.0       | 0.04  |
| Kiloniellales     | 33.0       | 0.03  |
| Enterobacteriales | 31.0       | 0.03  |
| Bacteroidales     | 28.0       | 0.03  |
| BPC015            | 27.0       | 0.03  |
| Flavobacteriales  | 25.0       | 0.02  |
| Pirellulales      | 23.0       | 0.02  |
| Bacillales        | 21.0       | 0.02  |
| Rhodospirillales  | 19.0       | 0.02  |
| Legionellales     | 15.0       | 0.01  |
| Rhodobacterales   | 15.0       | 0.01  |
| Gemmatales        | 14.0       | 0.01  |
| Clostridiales     | 13.0       | 0.01  |
| Sva0725           | 11.0       | 0.01  |

Top Order Classification

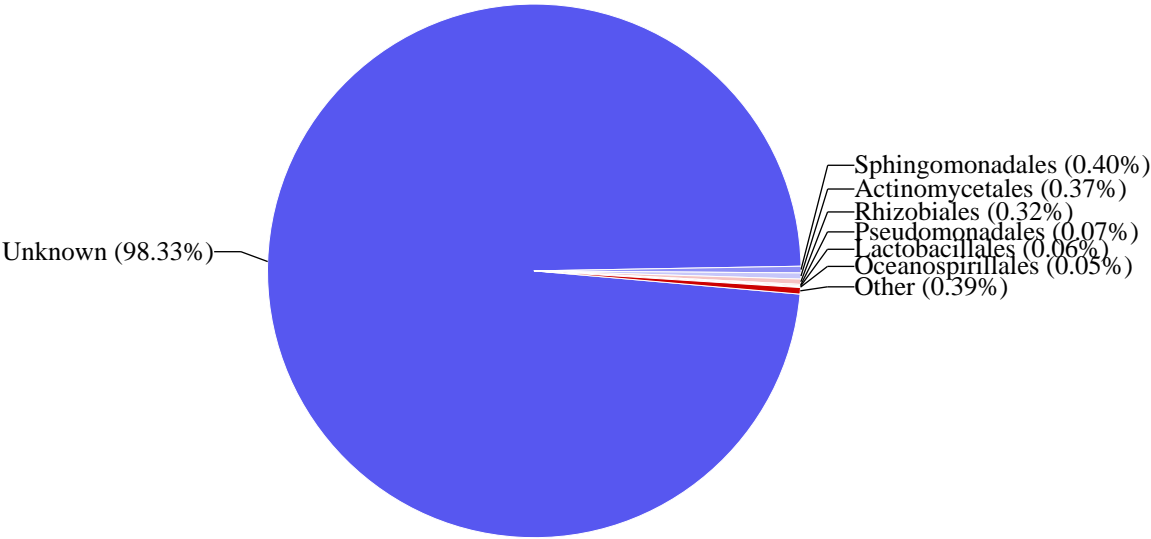

## Family Classification

| Family               | Read Count | %     |
|----------------------|------------|-------|
| Unknown              | 99106.0    | 98.57 |
| Sphingomonadaceae    | 401.0      | 0.40  |
| Methylobacteriaceae  | 311.0      | 0.31  |
| Propionibacteriaceae | 84.0       | 0.08  |
| Corynebacteriaceae   | 76.0       | 0.08  |
| Pseudomonadaceae     | 59.0       | 0.06  |
| Endozoicimonaceae    | 48.0       | 0.05  |
| Anaeroplasmataceae   | 44.0       | 0.04  |
| Actinomycetaceae     | 35.0       | 0.03  |
| Lactobacillaceae     | 33.0       | 0.03  |
| Enterobacteriaceae   | 31.0       | 0.03  |
| Micrococcaceae       | 28.0       | 0.03  |
| Marinilabiaceae      | 28.0       | 0.03  |
| Flavobacteriaceae    | 25.0       | 0.02  |
| Pirellulaceae        | 23.0       | 0.02  |
| Comamonadaceae       | 21.0       | 0.02  |
| Intrasporangiaceae   | 20.0       | 0.02  |
| Mycobacteriaceae     | 20.0       | 0.02  |
| Enterococcaceae      | 19.0       | 0.02  |
| Dermabacteraceae     | 17.0       | 0.02  |
| Micromonosporaceae   | 17.0       | 0.02  |
| Legionellaceae       | 15.0       | 0.01  |
| Rhodobacteraceae     | 15.0       | 0.01  |
| Microbacteriaceae    | 14.0       | 0.01  |
| Isosphaeraceae       | 14.0       | 0.01  |
| Moraxellaceae        | 14.0       | 0.01  |
| Gordoniaceae         | 13.0       | 0.01  |
| Burkholderiaceae     | 12.0       | 0.01  |

## Top Family Classification

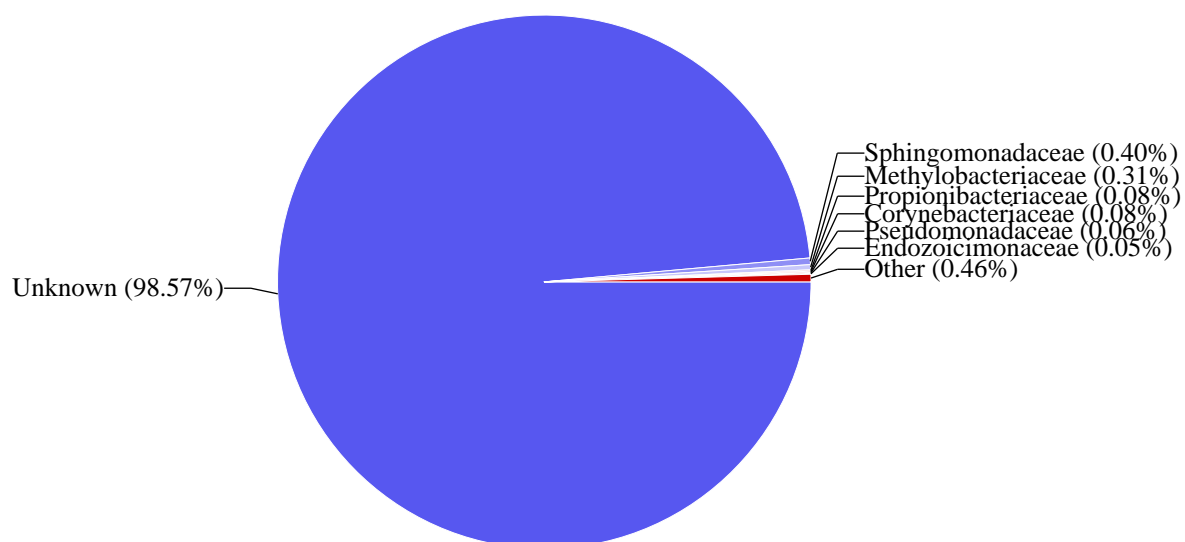



Genus Classification

| Genus             | Read Count | %     |
|-------------------|------------|-------|
| Unknown           | 99468.0    | 98.88 |
| Sphingomonas      | 360.0      | 0.36  |
| Methylobacterium  | 307.0      | 0.31  |
| Propionibacterium | 84.0       | 0.08  |
| Corynebacterium   | 76.0       | 0.08  |
| Pseudomonas       | 35.0       | 0.03  |
| Actinomyces       | 34.0       | 0.03  |
| Lactobacillus     | 32.0       | 0.03  |
| Ruminofilibacter  | 28.0       | 0.03  |
| Micrococcus       | 26.0       | 0.03  |
| Novosphingobium   | 24.0       | 0.02  |
| Mycobacterium     | 20.0       | 0.02  |
| Enterococcus      | 19.0       | 0.02  |
| Legionella        | 15.0       | 0.01  |
| Dermabacter       | 14.0       | 0.01  |
| planctomycete     | 13.0       | 0.01  |
| Gordonia          | 13.0       | 0.01  |
| Burkholderia      | 12.0       | 0.01  |
| Acinetobacter     | 11.0       | 0.01  |

Top Genus Classification

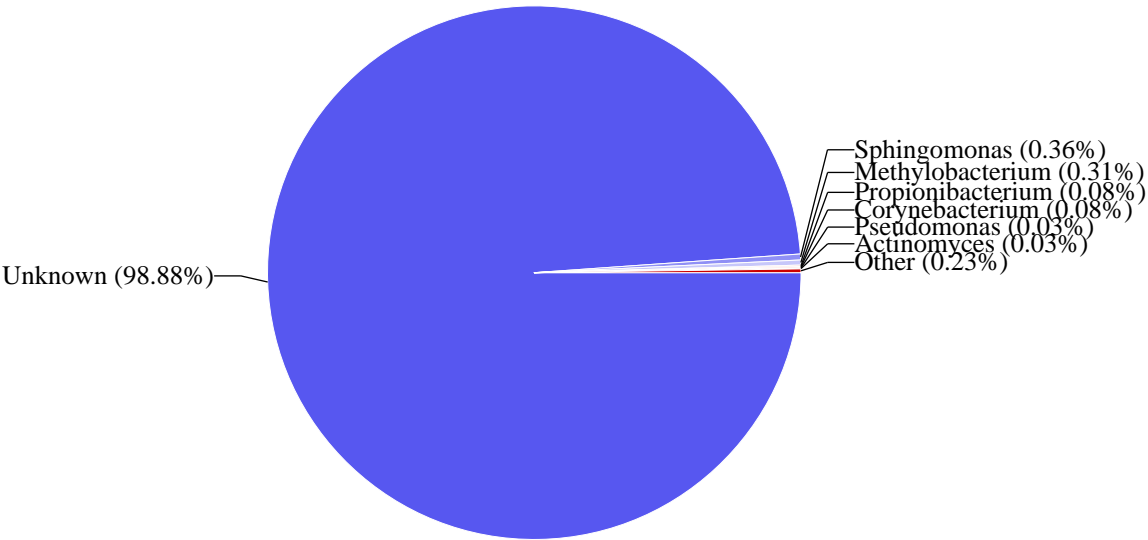

Species Classification

| Species                        | Read Count | %     |
|--------------------------------|------------|-------|
| Unknown                        | 100175.0   | 99.59 |
| Unknown_                       | 183.0      | 0.18  |
| Corynebacterium_               | 63.0       | 0.06  |
| Actinomyces_                   | 34.0       | 0.03  |
| Ruminofilibacter_xylanolyticum | 28.0       | 0.03  |
| Micrococcus_                   | 25.0       | 0.02  |
| Dermabacter_                   | 14.0       | 0.01  |
| Lactobacillus_mucosae          | 14.0       | 0.01  |
| Propionibacterium_acnes        | 13.0       | 0.01  |
| Gordonia_                      | 13.0       | 0.01  |
| Pseudomonas_balearica          | 12.0       | 0.01  |
| Mycobacterium_vaccae           | 11.0       | 0.01  |

Top Species Classification

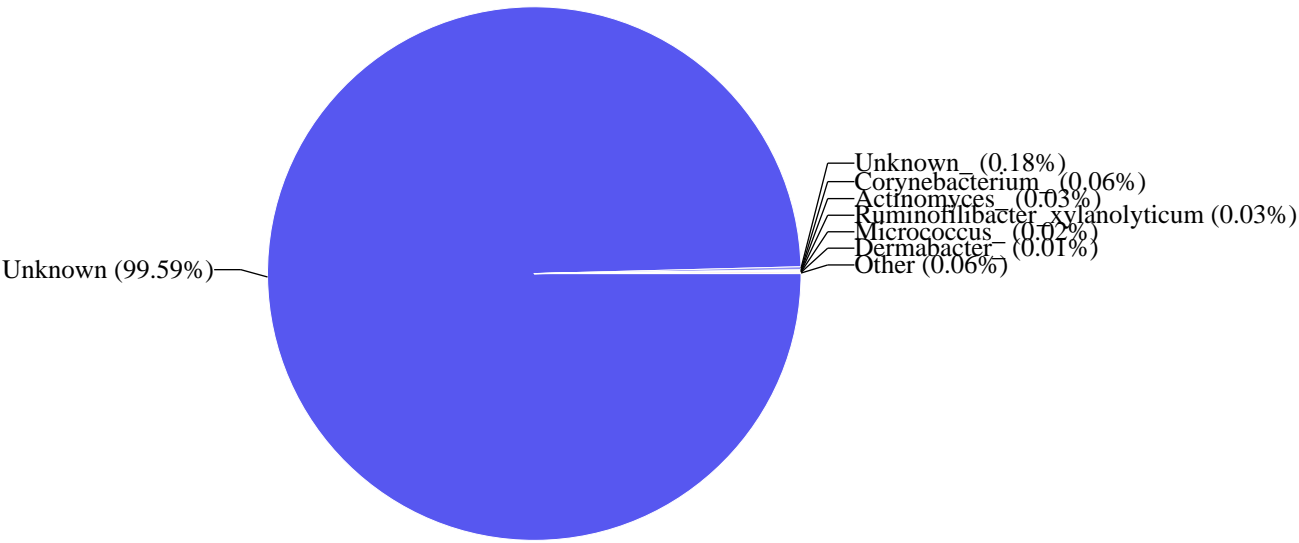

----- End of report -----
