# Supplementary material for: Metabolic Profiling, Antiviral Activity and the Microbiome of Some Mauritian Soft Corals
Source: MDPI journal article supplement (doi:10.3390/md21110574), 2023-10-31
Supplement: s1 [file s1]

Table S6: % yield of each soft corals

| Soft corals          | % yield |               |                 |          |
|----------------------|---------|---------------|-----------------|----------|
|                      | Hexane  | Ethyl Acetate | Dichloromethane | Methanol |
| <i>S.polydactyla</i> | 8       | 4             | 0.8             | 0.6      |
| <i>C.simplex</i>     | 3       | 2.0           | 0.44            | 0.3      |
| <i>L.patulum</i>     | 2.6     | 1.88          | 0.36            | 0.2      |
| <i>L.crassum</i>     | 10      | 4             | 0.42            | 0.2      |

Table S7: Crude concentration of each soft corals used

| Soft corals          | Crude concentration mg/mL |               |                 |          |
|----------------------|---------------------------|---------------|-----------------|----------|
|                      | Hexane                    | Ethyl Acetate | Dichloromethane | Methanol |
| <i>S.polydactyla</i> | 38                        | 54.6          | 28              | 98       |
| <i>C.simplex</i>     | 64                        | 16            | 17.8            | 157      |
| <i>L.patulum</i>     | 45.4                      | 11.8          | 12.8            | 100      |
| <i>L.crassum</i>     | 65                        | 58            | 25.4            | 74       |
