# Supplementary material for: Metabolic Profiling, Antiviral Activity and the Microbiome of Some Mauritian Soft Corals
Source: MDPI journal article supplement (doi:10.3390/md21110574), 2023-10-31
Supplement: s1 [file s1]

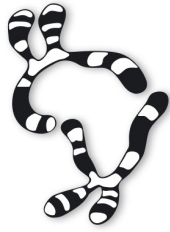

inqaba biotec™

*Africa's Genomics Company*

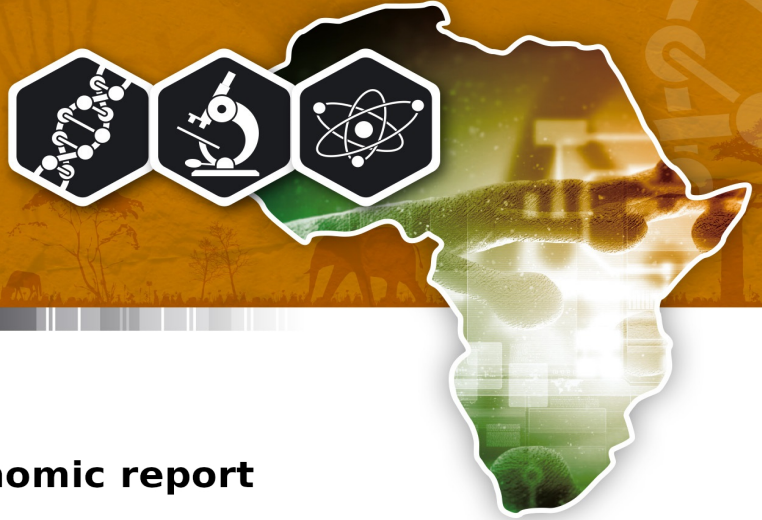

## inqaba biotec metagenomic report

### Sample Information

|              |                          |
|--------------|--------------------------|
| Index:       | S6                       |
| Sample Name: | FF7                      |
| Run Name:    | 230508                   |
| Report Date: | Thu May 11 08:39:05 2023 |

This report contains the summarized metagenomic analysis of 16s/ITS1F gene sequencing. Samples were sequenced on an illumina system ([www.illumina.com](http://www.illumina.com)). Reads were processed through usearch (<https://drive5.com/usearch>) and taxonomic information was determined based on the Ribosomal Database Project's (<http://rdp.cme.msu.edu/index.jsp>) 16s database v16 or in the case of ITS1F, the RDP ITS V2 database. Operational Taxonomic Units (OTUs) contributing less than 1% of the total data have been excluded Report generation command used :  
\$create\_vsearch\_single\_sample\_pdf\_report\_illumina.py KT-FF7\_S6.merged.filt.otu.table.tsv S6 FF7 230508 16s

## Taxonomical Classification

### Kingdom Classification

| Kingdom  | Read Count | %     |
|----------|------------|-------|
| Bacteria | 61605.0    | 99.64 |
| Archaea  | 136.0      | 0.22  |
| Unknown  | 87.0       | 0.14  |

### Top Kingdom Classification

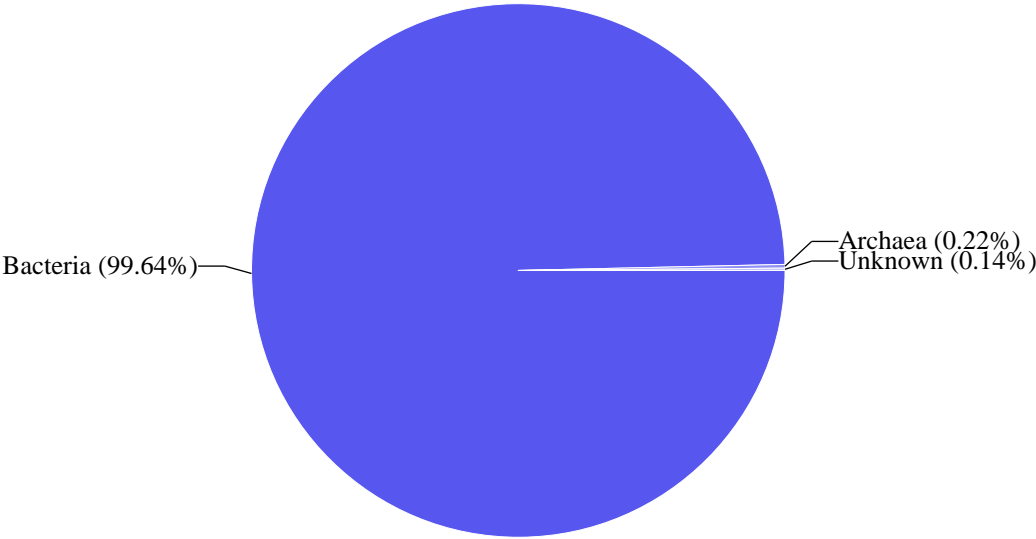

Phylum Classification

| Phyla Classification | Read Count | %     |
|----------------------|------------|-------|
| Proteobacteria       | 37355.0    | 60.42 |
| Actinobacteria       | 5468.0     | 8.84  |
| Unknown              | 5240.0     | 8.48  |
| Firmicutes           | 4118.0     | 6.66  |
| Planctomycetes       | 2753.0     | 4.45  |
| Bacteroidetes        | 1485.0     | 2.40  |
| Cyanobacteria        | 1415.0     | 2.29  |
| SBR1093              | 1322.0     | 2.14  |
| Verrucomicrobia      | 805.0      | 1.30  |
| WWE1                 | 491.0      | 0.79  |
| Chloroflexi          | 354.0      | 0.57  |
| Spirochaetes         | 293.0      | 0.47  |
| TM7                  | 140.0      | 0.23  |
| GN02                 | 137.0      | 0.22  |
| Acidobacteria        | 136.0      | 0.22  |
| Euryarchaeota        | 101.0      | 0.16  |
| Nitrospirae          | 55.0       | 0.09  |
| WS2                  | 40.0       | 0.06  |
| Crenarchaeota        | 35.0       | 0.06  |
| Synergistetes        | 35.0       | 0.06  |
| WS3                  | 23.0       | 0.04  |
| Chlorobi             | 9.0        | 0.01  |
|                      | 9.0        | 0.01  |
| Gemmatimonadetes     | 7.0        | 0.01  |

## Top Phylum Classification

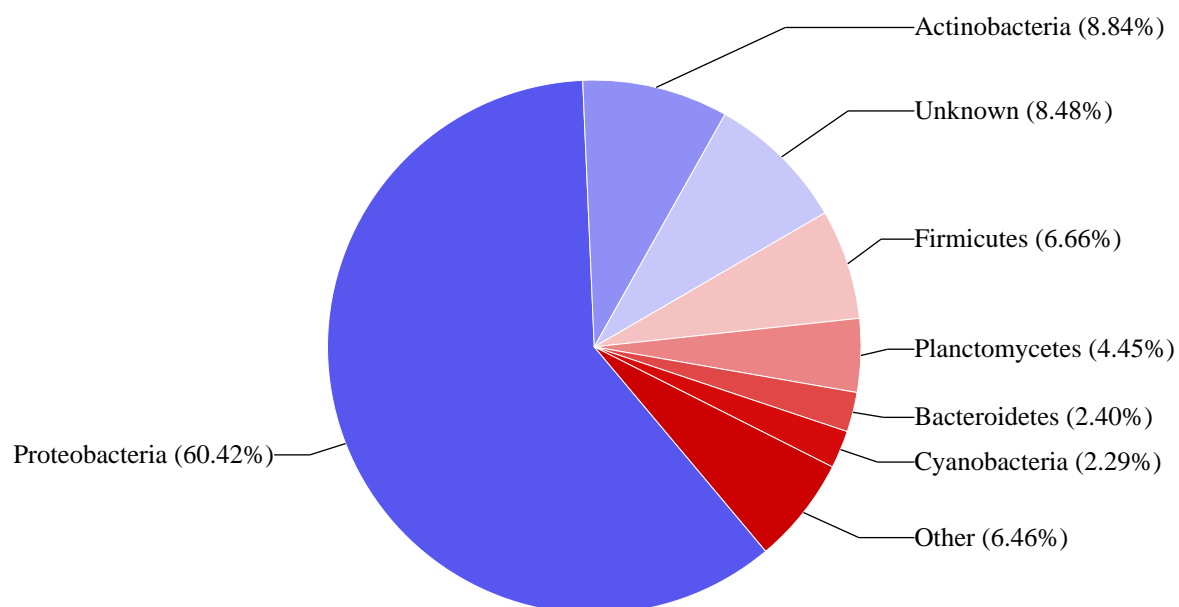

**Class Classification**

| Class                    | Read Count | %     |
|--------------------------|------------|-------|
| Alphaproteobacteria      | 27207.0    | 44.01 |
| Gammaproteobacteria      | 7545.0     | 12.20 |
| Unknown                  | 6921.0     | 11.19 |
| Actinobacteria           | 4700.0     | 7.60  |
| Bacilli                  | 3649.0     | 5.90  |
| Planctomycetia           | 2580.0     | 4.17  |
| Betaproteobacteria       | 1247.0     | 2.02  |
| Flavobacteriia           | 912.0      | 1.48  |
| Deltaproteobacteria      | 884.0      | 1.43  |
| Verrucomicrobiae         | 770.0      | 1.25  |
| EC214                    | 714.0      | 1.15  |
|                          | 654.0      | 1.06  |
| VHS                      | 604.0      | 0.98  |
| Clostridia               | 469.0      | 0.76  |
| Thermoleophilia          | 443.0      | 0.72  |
| Spirochaetes             | 293.0      | 0.47  |
| Cytophagia               | 207.0      | 0.33  |
| Acidimicrobiia           | 183.0      | 0.30  |
| Sphingobacteriia         | 158.0      | 0.26  |
| Nostocophycideae         | 156.0      | 0.25  |
| Anaerolineae             | 148.0      | 0.24  |
| TM7                      | 139.0      | 0.22  |
| 3BR                      | 137.0      | 0.22  |
| Acidobacteria            | 135.0      | 0.22  |
| C6                       | 133.0      | 0.22  |
| Rubrobacteria            | 123.0      | 0.20  |
| Thermomicrobia           | 119.0      | 0.19  |
| Halobacteria             | 101.0      | 0.16  |
| Ellin6529                | 87.0       | 0.14  |
| Bacteroidia              | 81.0       | 0.13  |
| Nitrospira               | 55.0       | 0.09  |
| Synechococcophycideae    | 53.0       | 0.09  |
| SHA                      | 40.0       | 0.06  |
| OM190                    | 39.0       | 0.06  |
| Thaumarchaeota           | 35.0       | 0.06  |
| Synergistia              | 35.0       | 0.06  |
| Oscillatoriohaptophyceae | 32.0       | 0.05  |
| PRR                      | 23.0       | 0.04  |
| SJA                      | 9.0        | 0.01  |

|      |     |      |
|------|-----|------|
| Gemm | 7.0 | 0.01 |
|------|-----|------|

Top Class Classification

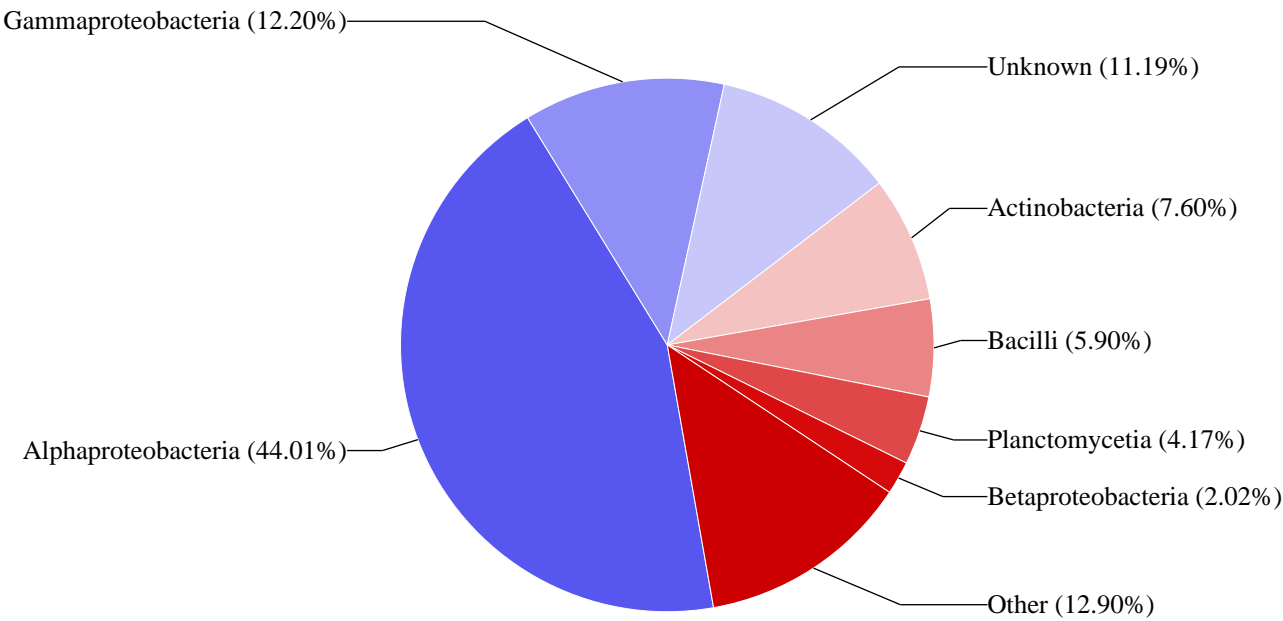

## Order Classification

| Order              | Read Count | %     |
|--------------------|------------|-------|
| Unknown            | 16297.0    | 26.37 |
| Rhizobiales        | 8270.0     | 13.38 |
| Actinomycetales    | 4700.0     | 7.60  |
| Sphingomonadales   | 4325.0     | 7.00  |
| Rhodobacterales    | 4182.0     | 6.77  |
|                    | 3565.0     | 5.77  |
| Oceanospirillales  | 3427.0     | 5.54  |
| Bacillales         | 3048.0     | 4.93  |
| Pirellulales       | 2147.0     | 3.47  |
| Pseudomonadales    | 2129.0     | 3.44  |
| Flavobacteriales   | 912.0      | 1.48  |
| Enterobacteriales  | 791.0      | 1.28  |
| Verrucomicrobiales | 770.0      | 1.25  |
| Burkholderiales    | 612.0      | 0.99  |
| Methylophilales    | 609.0      | 0.99  |
| Lactobacillales    | 579.0      | 0.94  |
| Clostridiales      | 469.0      | 0.76  |
| Spirobacillales    | 439.0      | 0.71  |
| Gaiellales         | 415.0      | 0.67  |
| Gemmatales         | 356.0      | 0.58  |
| Alteromonadales    | 328.0      | 0.53  |
| Caulobacterales    | 319.0      | 0.52  |
| Rhodospirillales   | 255.0      | 0.41  |
| NB1                | 237.0      | 0.38  |
| Cytophagales       | 207.0      | 0.33  |
| Acidimicrobiales   | 183.0      | 0.30  |
| Sphingobacteriales | 158.0      | 0.26  |
| Nostocales         | 156.0      | 0.25  |
| d113               | 133.0      | 0.22  |
| Chromatiales       | 132.0      | 0.21  |
| Rubrobacterales    | 123.0      | 0.20  |
| JG30               | 118.0      | 0.19  |
| BPC015             | 113.0      | 0.18  |
| Thiotrichales      | 106.0      | 0.17  |
| Halobacteriales    | 101.0      | 0.16  |
| Spirochaetales     | 93.0       | 0.15  |
| GMD14H09           | 83.0       | 0.13  |
| Bacteroidales      | 81.0       | 0.13  |
| Vibrionales        | 78.0       | 0.13  |

|                     |      |      |
|---------------------|------|------|
| Aeromonadales       | 71.0 | 0.11 |
| Planctomycetales    | 71.0 | 0.11 |
| SHA                 | 69.0 | 0.11 |
| Caldilineales       | 62.0 | 0.10 |
| Kiloniellales       | 57.0 | 0.09 |
| Nitrospirales       | 55.0 | 0.09 |
| Synechococcales     | 52.0 | 0.08 |
| Legionellales       | 45.0 | 0.07 |
| agg27               | 39.0 | 0.06 |
| Synergistales       | 35.0 | 0.06 |
| Nitrososphaerales   | 33.0 | 0.05 |
| Myxococcales        | 32.0 | 0.05 |
| Solirubrobacterales | 28.0 | 0.05 |
| GN03                | 23.0 | 0.04 |
| iii1                | 22.0 | 0.04 |
| Salinisphaerales    | 13.0 | 0.02 |
| Thiohalorhabdales   | 13.0 | 0.02 |
| SBR1031             | 12.0 | 0.02 |
| Syntrophobacterales | 12.0 | 0.02 |
| Desulfobacterales   | 12.0 | 0.02 |
| PYR10d3             | 8.0  | 0.01 |

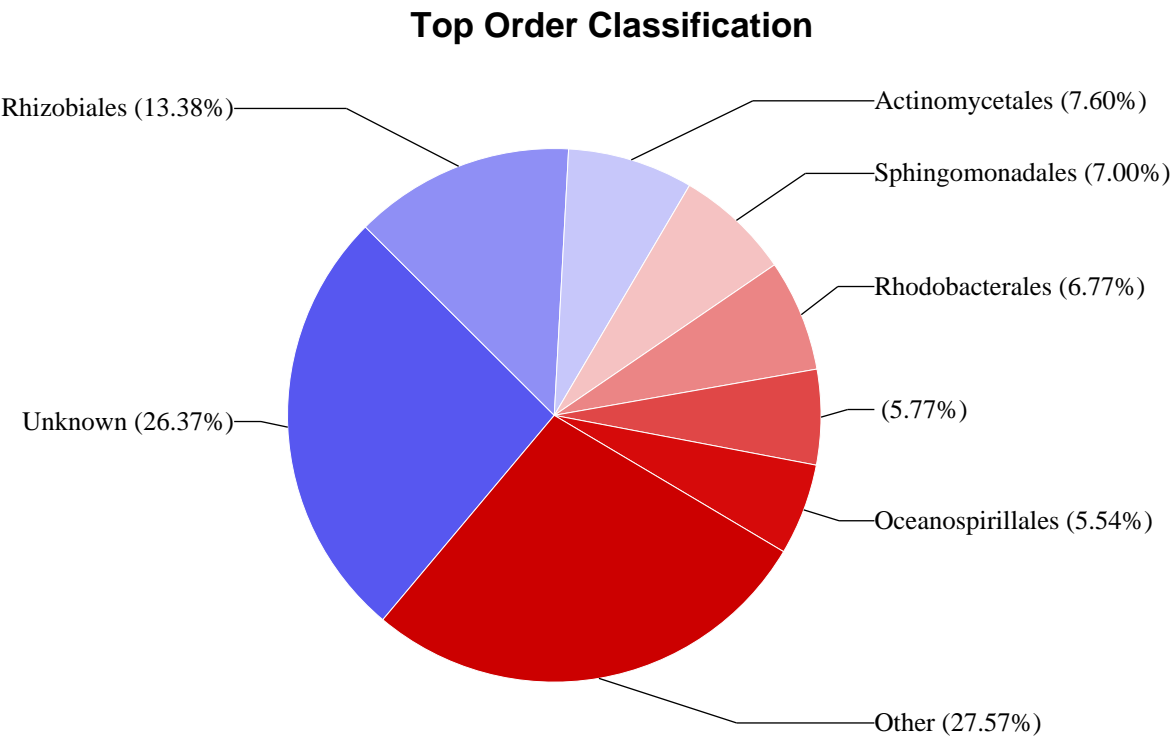



## Family Classification

| Family               | Read Count | %     |
|----------------------|------------|-------|
| Unknown              | 24459.0    | 39.57 |
| Hyphomicrobiaceae    | 6276.0     | 10.15 |
| Rhodobacteraceae     | 4128.0     | 6.68  |
| Sphingomonadaceae    | 3798.0     | 6.14  |
| Endozoicimonaceae    | 3349.0     | 5.42  |
| Pirellulaceae        | 2147.0     | 3.47  |
| Moraxellaceae        | 1681.0     | 2.72  |
| Methylobacteriaceae  | 1451.0     | 2.35  |
| Bacillaceae          | 1263.0     | 2.04  |
| Mycobacteriaceae     | 901.0      | 1.46  |
| Enterobacteriaceae   | 791.0      | 1.28  |
| Verrucomicrobiaceae  | 770.0      | 1.25  |
| Propionibacteriaceae | 764.0      | 1.24  |
| Flavobacteriaceae    | 656.0      | 1.06  |
| Methylophilaceae     | 609.0      | 0.99  |
| Erythrobacteraceae   | 523.0      | 0.85  |
| Dietziaceae          | 512.0      | 0.83  |
| Staphylococcaceae    | 461.0      | 0.75  |
| Pseudomonadaceae     | 448.0      | 0.72  |
| Corynebacteriaceae   | 442.0      | 0.72  |
| Streptomycetaceae    | 387.0      | 0.63  |
| Comamonadaceae       | 387.0      | 0.63  |
| Caulobacteraceae     | 319.0      | 0.52  |
| Micrococcaceae       | 288.0      | 0.47  |
| Brevibacteriaceae    | 252.0      | 0.41  |
| Oxalobacteraceae     | 225.0      | 0.36  |
| Ruminococcaceae      | 208.0      | 0.34  |
| Streptococcaceae     | 204.0      | 0.33  |
| Lactobacillaceae     | 204.0      | 0.33  |
| Acetobacteraceae     | 166.0      | 0.27  |
| Nocardioidaceae      | 165.0      | 0.27  |
| OM60                 | 161.0      | 0.26  |
| Sphingobacteriaceae  | 158.0      | 0.26  |
| Microbacteriaceae    | 148.0      | 0.24  |
| Enterococcaceae      | 147.0      | 0.24  |
| Isosphaeraceae       | 137.0      | 0.22  |
| Rubrobacteraceae     | 123.0      | 0.20  |
| Nostocaceae          | 114.0      | 0.18  |
| Planococcaceae       | 110.0      | 0.18  |

|                        |       |      |
|------------------------|-------|------|
| Piscirickettsiaceae    | 106.0 | 0.17 |
| Dermabacteraceae       | 103.0 | 0.17 |
| Halobacteriaceae       | 101.0 | 0.16 |
| Peptostreptococcaceae  | 101.0 | 0.16 |
| Phyllobacteriaceae     | 97.0  | 0.16 |
| Gemmataceae            | 95.0  | 0.15 |
| Spirochaetaceae        | 93.0  | 0.15 |
| Paenibacillaceae       | 91.0  | 0.15 |
| Alteromonadaceae       | 89.0  | 0.14 |
| Nocardiaceae           | 84.0  | 0.14 |
| Halomonadaceae         | 78.0  | 0.13 |
| Aeromonadaceae         | 71.0  | 0.11 |
| Planctomycetaceae      | 71.0  | 0.11 |
| Bacteroidaceae         | 71.0  | 0.11 |
| Cryomorphaceae         | 69.0  | 0.11 |
| Chitinophagaceae       | 68.0  | 0.11 |
| Brucellaceae           | 67.0  | 0.11 |
| Flammeovirgaceae       | 64.0  | 0.10 |
| Caldilineaceae         | 62.0  | 0.10 |
| Nitrospiraceae         | 55.0  | 0.09 |
| Hyphomonadaceae        | 54.0  | 0.09 |
| Clostridiaceae         | 54.0  | 0.09 |
| Intrasporangiaceae     | 52.0  | 0.08 |
| Rhodospirillaceae      | 49.0  | 0.08 |
| Gordoniaceae           | 42.0  | 0.07 |
| Xanthobacteraceae      | 42.0  | 0.07 |
| Vibrionaceae           | 39.0  | 0.06 |
| Synechococcaceae       | 35.0  | 0.06 |
| koll13                 | 35.0  | 0.06 |
| TTA_B6                 | 34.0  | 0.06 |
| Nitrososphaeraceae     | 33.0  | 0.05 |
| Cohaesibacteraceae     | 31.0  | 0.05 |
| Pseudoalteromonadaceae | 31.0  | 0.05 |
| Gaiellaceae            | 27.0  | 0.04 |
| Rhizobiaceae           | 27.0  | 0.04 |
| Saprospiraceae         | 25.0  | 0.04 |
| Rhodothermaceae        | 24.0  | 0.04 |
| Micromonosporaceae     | 21.0  | 0.03 |
| Methylocystaceae       | 19.0  | 0.03 |
| Cytophagaceae          | 19.0  | 0.03 |
| JdFBGBact              | 18.0  | 0.03 |
| Listeriaceae           | 17.0  | 0.03 |
| Acaryochloridaceae     | 17.0  | 0.03 |

|                      |      |      |
|----------------------|------|------|
| Salinisphaeraceae    | 13.0 | 0.02 |
| Cystobacterineae     | 13.0 | 0.02 |
| A4b                  | 12.0 | 0.02 |
| Syntrophobacteraceae | 12.0 | 0.02 |
| Desulfobulbaceae     | 11.0 | 0.02 |
| Rikenellaceae        | 10.0 | 0.02 |
| Lachnospiraceae      | 10.0 | 0.02 |
| Pseudonocardiaceae   | 8.0  | 0.01 |
| Dermacoccaceae       | 7.0  | 0.01 |

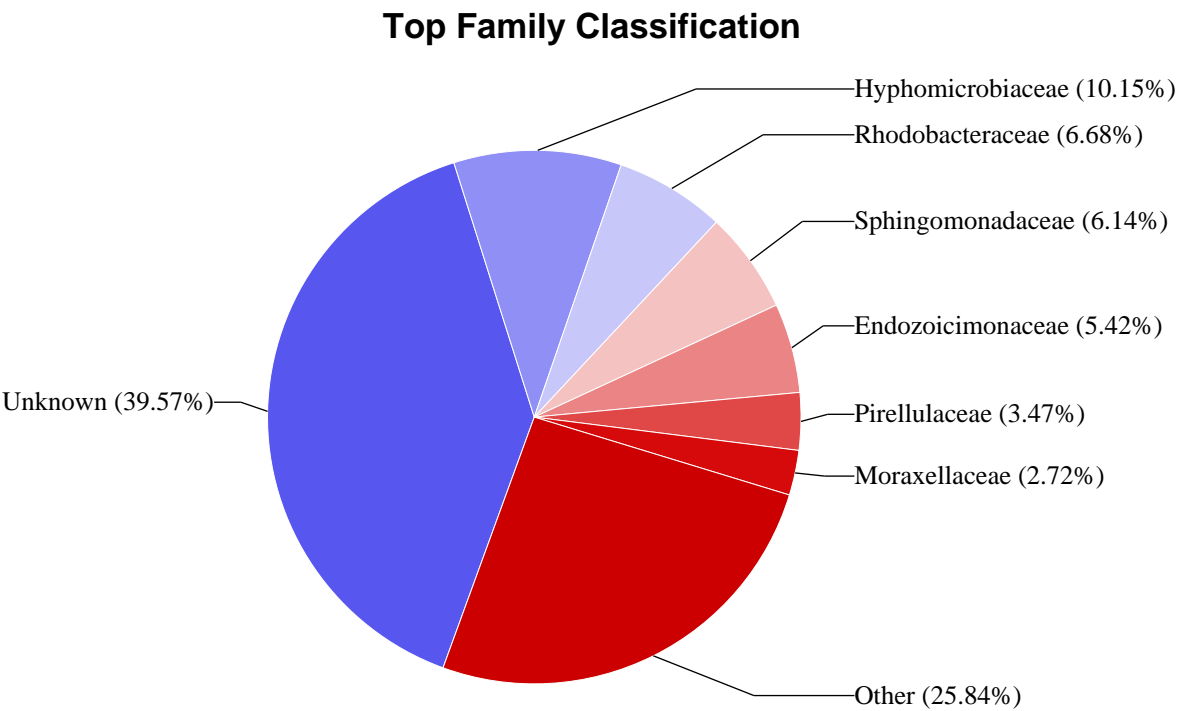

## Genus Classification

| Genus             | Read Count | %     |
|-------------------|------------|-------|
| Unknown           | 43235.0    | 69.99 |
| Sphingomonas      | 3545.0     | 5.74  |
| Methylobacterium  | 1418.0     | 2.30  |
| Psychrobacter     | 1250.0     | 2.02  |
| Paracoccus        | 1079.0     | 1.75  |
| Bacillus          | 999.0      | 1.62  |
| Mycobacterium     | 901.0      | 1.46  |
| Propionibacterium | 761.0      | 1.23  |
| Staphylococcus    | 485.0      | 0.79  |
| Corynebacterium   | 442.0      | 0.72  |
| Dietzia           | 430.0      | 0.70  |
| planctomycete     | 389.0      | 0.63  |
| Acinetobacter     | 384.0      | 0.62  |
| Streptomyces      | 375.0      | 0.61  |
| Endozoicomonas    | 343.0      | 0.56  |
| Brevibacterium    | 252.0      | 0.41  |
| Pseudozobellia    | 226.0      | 0.37  |
| Massilia          | 218.0      | 0.35  |
| Streptococcus     | 196.0      | 0.32  |
| Nitrobacteria     | 196.0      | 0.32  |
| Lactobacillus     | 196.0      | 0.32  |
| Exiguobacterium   | 190.0      | 0.31  |
| Pseudomonas       | 179.0      | 0.29  |
| Hyphomicrobium    | 167.0      | 0.27  |
| Planctomycete     | 167.0      | 0.27  |
| Sphingobacterium  | 156.0      | 0.25  |
| Persicirhabdus    | 154.0      | 0.25  |
| Coccinimonas      | 151.0      | 0.24  |
| Enterococcus      | 146.0      | 0.24  |
| Cloacibacterium   | 135.0      | 0.22  |
| Rubrobacter       | 123.0      | 0.20  |
| Clostridium       | 118.0      | 0.19  |
| Oceanobacillus    | 101.0      | 0.16  |
| Kocuria           | 101.0      | 0.16  |
| Ucs1325           | 101.0      | 0.16  |
| Novosphingobium   | 99.0       | 0.16  |
| Treponema         | 92.0       | 0.15  |
| Micrococcus       | 84.0       | 0.14  |
| Brachybacterium   | 84.0       | 0.14  |
| Caulobacter       | 82.0       | 0.13  |
| Paenibacillus     | 81.0       | 0.13  |

|                   |      |      |
|-------------------|------|------|
| Rhodococcus       | 81.0 | 0.13 |
| Hoeflea           | 81.0 | 0.13 |
| Halomonas         | 78.0 | 0.13 |
| Nocardioides      | 74.0 | 0.12 |
| Aeromonas         | 71.0 | 0.11 |
| Planctomyces      | 71.0 | 0.11 |
| Bacteroides       | 71.0 | 0.11 |
| Haliea            | 70.0 | 0.11 |
| Salipiger         | 66.0 | 0.11 |
| Halococcus        | 62.0 | 0.10 |
| Ochrobactrum      | 58.0 | 0.09 |
| Craurococcus      | 57.0 | 0.09 |
| Hyphomonas        | 53.0 | 0.09 |
| Oscillospira      | 53.0 | 0.09 |
| Erythrobacter     | 51.0 | 0.08 |
| Gemmata           | 49.0 | 0.08 |
| Chryseobacterium  | 44.0 | 0.07 |
| Friedmanniella    | 43.0 | 0.07 |
| Marmoricola       | 43.0 | 0.07 |
| Gordonia          | 42.0 | 0.07 |
| Arenibacter       | 41.0 | 0.07 |
| Brevundimonas     | 39.0 | 0.06 |
| Microbispora      | 38.0 | 0.06 |
| mixed             | 35.0 | 0.06 |
| E6                | 34.0 | 0.06 |
| BD2               | 31.0 | 0.05 |
| Ruminococcus      | 28.0 | 0.05 |
| Kytococcus        | 27.0 | 0.04 |
| Alishewanella     | 27.0 | 0.04 |
| Enhydrobacter     | 26.0 | 0.04 |
| Candidatus        | 26.0 | 0.04 |
| Arthrobacter      | 26.0 | 0.04 |
| Ruegeria          | 26.0 | 0.04 |
| Halalkalicoccus   | 25.0 | 0.04 |
| Rubricoccus       | 24.0 | 0.04 |
| Sediminibacterium | 22.0 | 0.04 |
| Prochlorococcus   | 21.0 | 0.03 |
| Methylopila       | 19.0 | 0.03 |
| Hymenobacter      | 19.0 | 0.03 |
| Acaryochloris     | 17.0 | 0.03 |
| Marihabitans      | 16.0 | 0.03 |
| Cohaesibacter     | 15.0 | 0.02 |
| Filomicrobium     | 14.0 | 0.02 |

|                  |      |      |
|------------------|------|------|
| Brochothrix      | 14.0 | 0.02 |
| Salinisphaera    | 13.0 | 0.02 |
| Alistipes        | 10.0 | 0.02 |
| Brevibacillus    | 10.0 | 0.02 |
| Rhizobium        | 9.0  | 0.01 |
| Epulopiscium     | 9.0  | 0.01 |
| Verrucomicrobium | 9.0  | 0.01 |
| Roseovarius      | 9.0  | 0.01 |
| Methylothera     | 8.0  | 0.01 |
| Lactococcus      | 8.0  | 0.01 |
| Synechococcus    | 8.0  | 0.01 |
| Vibrio           | 7.0  | 0.01 |
| Pseudonocardia   | 7.0  | 0.01 |
| Dermacoccus      | 7.0  | 0.01 |

Top Genus Classification

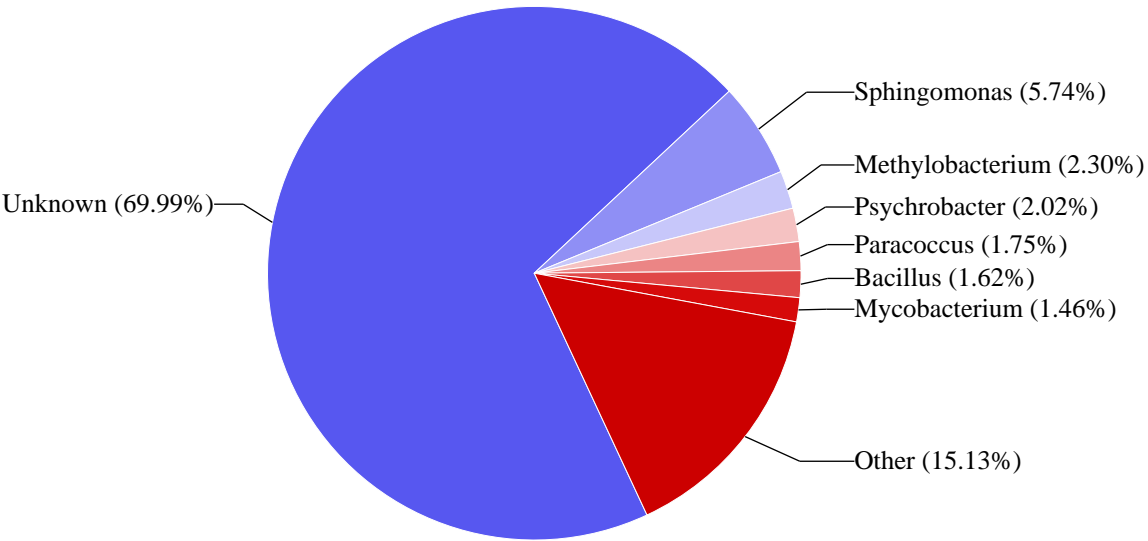

## Species Classification

| Species                       | Read Count | %     |
|-------------------------------|------------|-------|
| Unknown                       | 40654.0    | 65.85 |
| Unknown_                      | 13363.0    | 21.65 |
| Paracoccus_zeaxanthinifaciens | 988.0      | 1.60  |
| Psychrobacter_celer           | 576.0      | 0.93  |
| planctomycete_MS1399          | 266.0      | 0.43  |
| Corynebacterium_              | 226.0      | 0.37  |
| Pseudozobellia_thermophila    | 226.0      | 0.37  |
| Psychrobacter_meningitidis    | 207.0      | 0.34  |
| Psychrobacter_pacificensis    | 200.0      | 0.32  |
| Nitrobacteria_hamadaniensis   | 196.0      | 0.32  |
| Propionibacterium_acnes       | 194.0      | 0.31  |
| Exiguobacterium_              | 190.0      | 0.31  |
| Planctomycete_LF1             | 167.0      | 0.27  |
| Hyphomicrobium_               | 158.0      | 0.26  |
| Persicirhabdus_               | 154.0      | 0.25  |
| Coccinimonas_marina           | 151.0      | 0.24  |
| Lactobacillus_iners           | 147.0      | 0.24  |
| Sphingobacterium_             | 143.0      | 0.23  |
| Cloacibacterium_              | 135.0      | 0.22  |
| Rubrobacter_                  | 123.0      | 0.20  |
| Acinetobacter_rhizosphaerae   | 121.0      | 0.20  |
| Propionibacterium_granulosum  | 119.0      | 0.19  |
| Psychrobacter_marincola       | 119.0      | 0.19  |
| Mycobacterium_vaccae          | 109.0      | 0.18  |
| Kocuria_palustris             | 101.0      | 0.16  |
| Ucs1325_                      | 101.0      | 0.16  |
| Acinetobacter_guillouiae      | 94.0       | 0.15  |
| Treponema_                    | 92.0       | 0.15  |
| Clostridium_bartlettii        | 91.0       | 0.15  |
| Oceanobacillus_               | 91.0       | 0.15  |
| Paracoccus_marcusii           | 90.0       | 0.15  |
| Brachybacterium_              | 84.0       | 0.14  |
| Micrococcus_                  | 83.0       | 0.13  |
| Planctomyces_                 | 71.0       | 0.12  |
| Bacteroides_                  | 71.0       | 0.12  |
| Haliaea_mediterranea          | 70.0       | 0.11  |
| Salipiger_mucosus             | 66.0       | 0.11  |
| Halococcus_                   | 60.0       | 0.10  |
| Craurococcus_roseus           | 57.0       | 0.09  |

|                              |      |      |
|------------------------------|------|------|
| Ochrobactrum_intermedium     | 55.0 | 0.09 |
| Staphylococcus_sciuri        | 54.0 | 0.09 |
| Psychrobacter_               | 54.0 | 0.09 |
| Oscillospira_                | 53.0 | 0.09 |
| Paenibacillus_               | 52.0 | 0.08 |
| Brevibacterium_              | 52.0 | 0.08 |
| Rhodococcus_                 | 50.0 | 0.08 |
| Gemmata_                     | 49.0 | 0.08 |
| Hyphomonas_                  | 48.0 | 0.08 |
| Chryseobacterium_            | 44.0 | 0.07 |
| Friedmanniella_              | 43.0 | 0.07 |
| Gordonia_                    | 42.0 | 0.07 |
| Marmoricola_aurantiacus      | 42.0 | 0.07 |
| Arenibacter_                 | 41.0 | 0.07 |
| Brevundimonas_               | 39.0 | 0.06 |
| Microbispora_rosea           | 38.0 | 0.06 |
| Acinetobacter_lwoffii        | 37.0 | 0.06 |
| Bacillus_firmus              | 37.0 | 0.06 |
| mixed_culture                | 35.0 | 0.06 |
| E6_                          | 34.0 | 0.06 |
| Pseudomonas_stutzeri         | 34.0 | 0.06 |
| Novosphingobium_capsulatum   | 33.0 | 0.05 |
| BD2_                         | 31.0 | 0.05 |
| Acinetobacter_venetianus     | 31.0 | 0.05 |
| Ruminococcus_                | 28.0 | 0.05 |
| Kytococcus_                  | 27.0 | 0.04 |
| Alishewanella_               | 27.0 | 0.04 |
| Brevibacterium_casei         | 26.0 | 0.04 |
| Enhydrobacter_aerosaccus     | 26.0 | 0.04 |
| Candidatus_                  | 26.0 | 0.04 |
| Ruegeria_lacuscaerulensis    | 26.0 | 0.04 |
| Halalkalicoccus_tibetensis   | 25.0 | 0.04 |
| Rubricoccus_                 | 24.0 | 0.04 |
| Staphylococcus_saprophyticus | 24.0 | 0.04 |
| Sediminibacterium_           | 22.0 | 0.04 |
| Psychrobacter_pulmonis       | 21.0 | 0.03 |
| Prochlorococcus_             | 21.0 | 0.03 |
| Methylopila_                 | 19.0 | 0.03 |
| Hymenobacter_                | 19.0 | 0.03 |
| Paenibacillus_lautus         | 18.0 | 0.03 |
| Acaryochloris_               | 17.0 | 0.03 |
| Sphingomonas_azotifigens     | 16.0 | 0.03 |
| Pseudomonas_balearica        | 16.0 | 0.03 |



|                               |      |      |
|-------------------------------|------|------|
| Marihabitans_asiaticum        | 16.0 | 0.03 |
| Salinisphaera_                | 13.0 | 0.02 |
| Alistipes_onderdonkii         | 9.0  | 0.01 |
| Epulopiscium_                 | 9.0  | 0.01 |
| Verrucomicrobium_             | 9.0  | 0.01 |
| Roseovarius_                  | 9.0  | 0.01 |
| Methylothermus_               | 8.0  | 0.01 |
| Lactococcus_garvieae          | 8.0  | 0.01 |
| Synechococcus_                | 8.0  | 0.01 |
| Methylobacterium_mesophilicum | 7.0  | 0.01 |
| Pseudonocardia_halophobica    | 7.0  | 0.01 |
| Dermacoccus_                  | 7.0  | 0.01 |
| Caulobacter_vibrioides        | 7.0  | 0.01 |
| Brochothrix_                  | 7.0  | 0.01 |

Top Species Classification

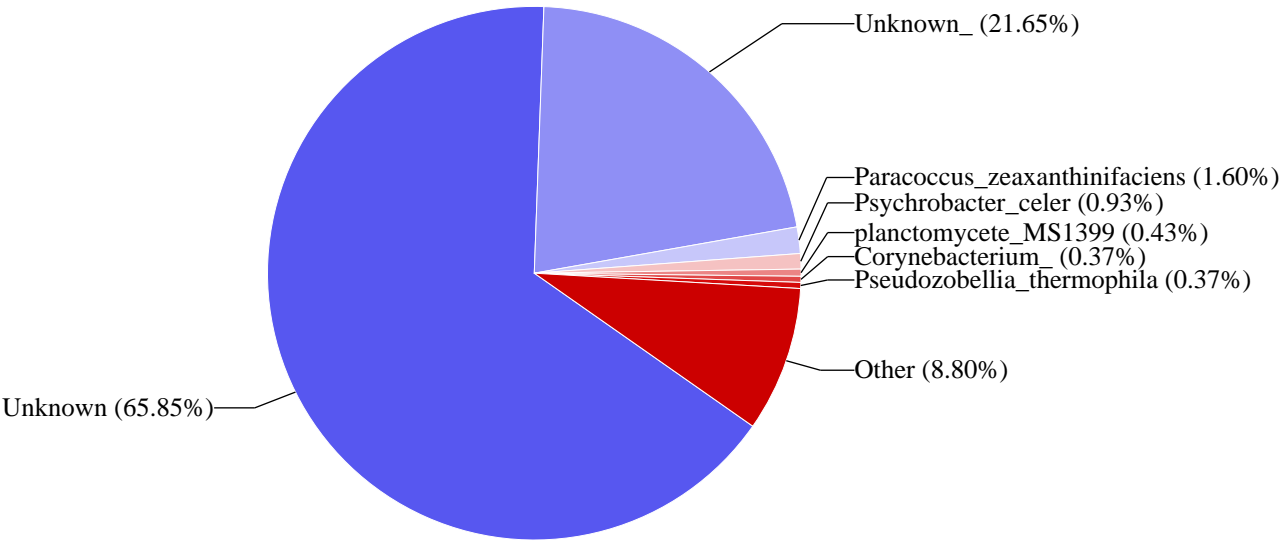

----- End of report -----
