# Supplementary material for: Metabolic Profiling, Antiviral Activity and the Microbiome of Some Mauritian Soft Corals
Source: MDPI journal article supplement (doi:10.3390/md21110574), 2023-10-31
Supplement: s1 [file s1]

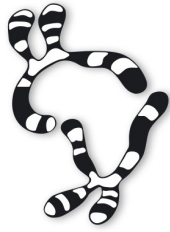

inqaba biotec™

*Africa's Genomics Company*

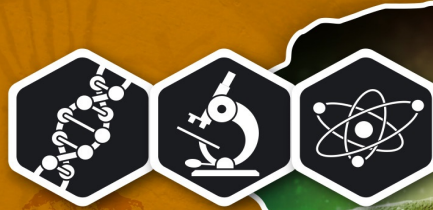

## inqaba biotec metagenomic report

### Sample Information

|              |                          |
|--------------|--------------------------|
| Index:       | S4                       |
| Sample Name: | SF3                      |
| Run Name:    | 230508                   |
| Report Date: | Thu May 11 08:41:47 2023 |

This report contains the summarized metagenomic analysis of 16s/ITS1F gene sequencing. Samples were sequenced on an illumina system ([www.illumina.com](http://www.illumina.com)). Reads were processed through usearch (<https://drive5.com/usearch>) and taxonomic information was determined based on the Ribosomal Database Project's (<http://rdp.cme.msu.edu/index.jsp>) 16s database v16 or in the case of ITS1F, the RDP ITS V2 database. Operational Taxonomic Units (OTUs) contributing less than 1% of the total data have been excluded Report generation command used :  
\$create\_vsearch\_single\_sample\_pdf\_report\_illumina.py KT-SF3\_S4.merged.filt.otu.table.tsv S4 SF3 230508 16s

Taxonomical Classification

Kingdom Classification

| Kingdom  | Read Count | %     |
|----------|------------|-------|
| Bacteria | 84301.0    | 93.79 |
| Unknown  | 5580.0     | 6.21  |

Top Kingdom Classification

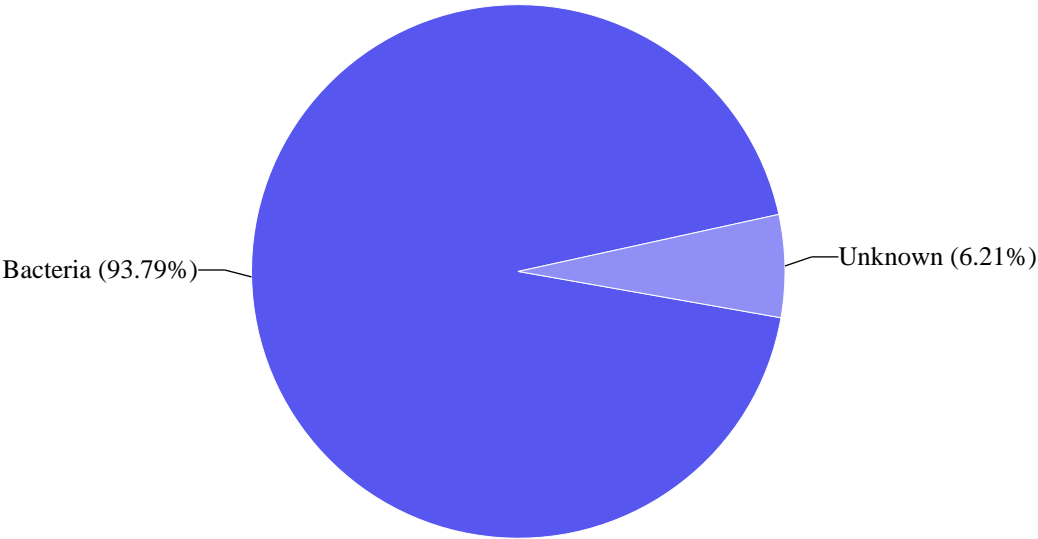

Phylum Classification

| Phyla Classification | Read Count | %     |
|----------------------|------------|-------|
| Unknown              | 73986.0    | 82.32 |
| Firmicutes           | 9175.0     | 10.21 |
| Proteobacteria       | 5082.0     | 5.65  |
| Bacteroidetes        | 670.0      | 0.75  |
| Actinobacteria       | 395.0      | 0.44  |
| Verrucomicrobia      | 143.0      | 0.16  |
| Spirochaetes         | 139.0      | 0.15  |
| Cyanobacteria        | 94.0       | 0.10  |
| Planctomycetes       | 86.0       | 0.10  |
| Chloroflexi          | 44.0       | 0.05  |
| Gemmatimonadetes     | 35.0       | 0.04  |
| GN02                 | 14.0       | 0.02  |
| WS3                  | 13.0       | 0.01  |

Top Phylum Classification

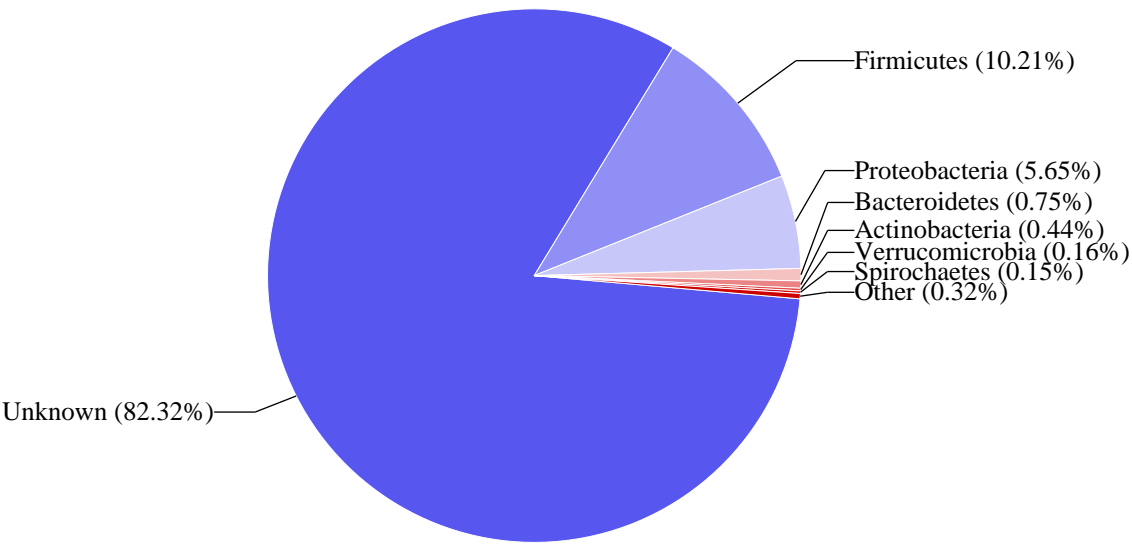

Class Classification

| Class                  | Read Count | %     |
|------------------------|------------|-------|
| Unknown                | 74415.0    | 82.79 |
| Bacilli                | 5066.0     | 5.64  |
| Clostridia             | 3763.0     | 4.19  |
| Alphaproteobacteria    | 3329.0     | 3.70  |
| Gammaproteobacteria    | 1359.0     | 1.51  |
| Flavobacteriia         | 461.0      | 0.51  |
| Actinobacteria         | 395.0      | 0.44  |
| Betaproteobacteria     | 359.0      | 0.40  |
| Spirochaetes           | 139.0      | 0.15  |
| Bacteroidia            | 105.0      | 0.12  |
| Verrucomicrobiae       | 102.0      | 0.11  |
|                        | 94.0       | 0.10  |
| Oscillatoriothricaceae | 73.0       | 0.08  |
| Planctomycetia         | 55.0       | 0.06  |
| Gemmatimonadetes       | 35.0       | 0.04  |
| Phycisphaerae          | 31.0       | 0.03  |
| Deltaproteobacteria    | 28.0       | 0.03  |
| Anaerolineae           | 26.0       | 0.03  |
| Ellin6529              | 18.0       | 0.02  |
| Nostocophycideae       | 13.0       | 0.01  |
| PRR                    | 13.0       | 0.01  |

Top Class Classification

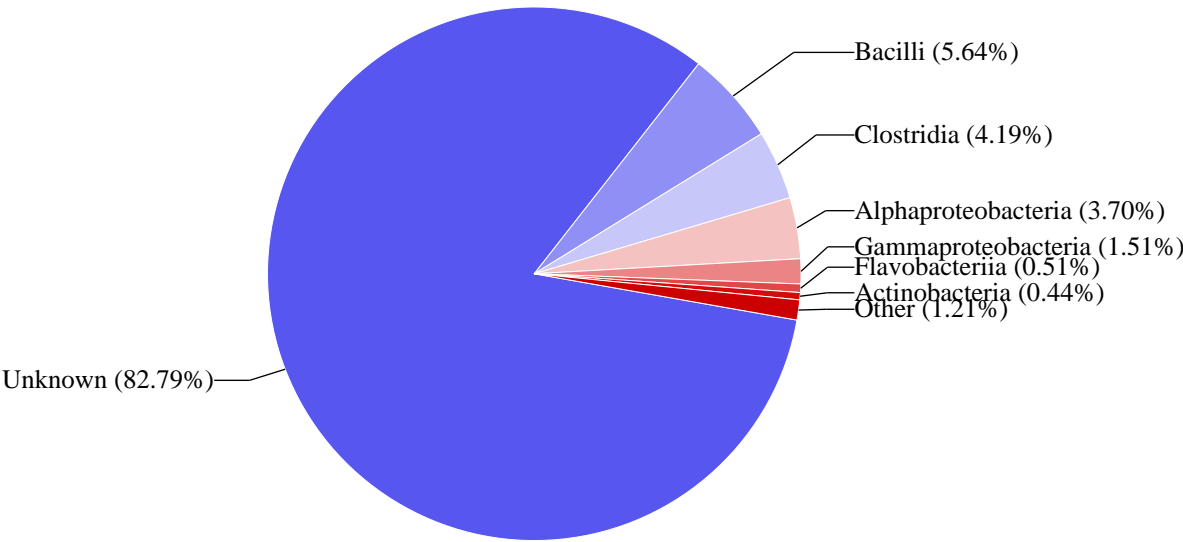

## Order Classification

| Order               | Read Count | %     |
|---------------------|------------|-------|
| Unknown             | 74679.0    | 83.11 |
| Lactobacillales     | 4838.0     | 5.38  |
| Clostridiales       | 3759.0     | 4.18  |
| Sphingomonadales    | 1939.0     | 2.16  |
| Rhizobiales         | 1051.0     | 1.17  |
| Oceanospirillales   | 550.0      | 0.61  |
| Flavobacteriales    | 461.0      | 0.51  |
| Actinomycetales     | 395.0      | 0.44  |
| Pseudomonadales     | 278.0      | 0.31  |
| Enterobacteriales   | 216.0      | 0.24  |
| Burkholderiales     | 189.0      | 0.21  |
| Bacillales          | 186.0      | 0.21  |
| Alteromonadales     | 169.0      | 0.19  |
| Methylophilales     | 144.0      | 0.16  |
| Bacteroidales       | 105.0      | 0.12  |
| Verrucomicrobiales  | 102.0      | 0.11  |
| Rhodobacterales     | 94.0       | 0.10  |
|                     | 76.0       | 0.08  |
| Caulobacterales     | 72.0       | 0.08  |
| Oscillatoriales     | 71.0       | 0.08  |
| Rhodospirillales    | 66.0       | 0.07  |
| Pirellulales        | 55.0       | 0.06  |
| Thiotrichales       | 48.0       | 0.05  |
| Spirochaetales      | 46.0       | 0.05  |
| Vibrionales         | 44.0       | 0.05  |
| Methylacidiphilales | 41.0       | 0.05  |
| Ellin5290           | 34.0       | 0.04  |
| Phycisphaerales     | 31.0       | 0.03  |
| Myxococcales        | 28.0       | 0.03  |
| SBR1031             | 24.0       | 0.03  |
| Kiloniellales       | 16.0       | 0.02  |
| Nostocales          | 13.0       | 0.01  |
| Sediment            | 13.0       | 0.01  |
| Gemellales          | 10.0       | 0.01  |
| Kordiimonadales     | 9.0        | 0.01  |
| Rhodocyclales       | 9.0        | 0.01  |

## Top Order Classification

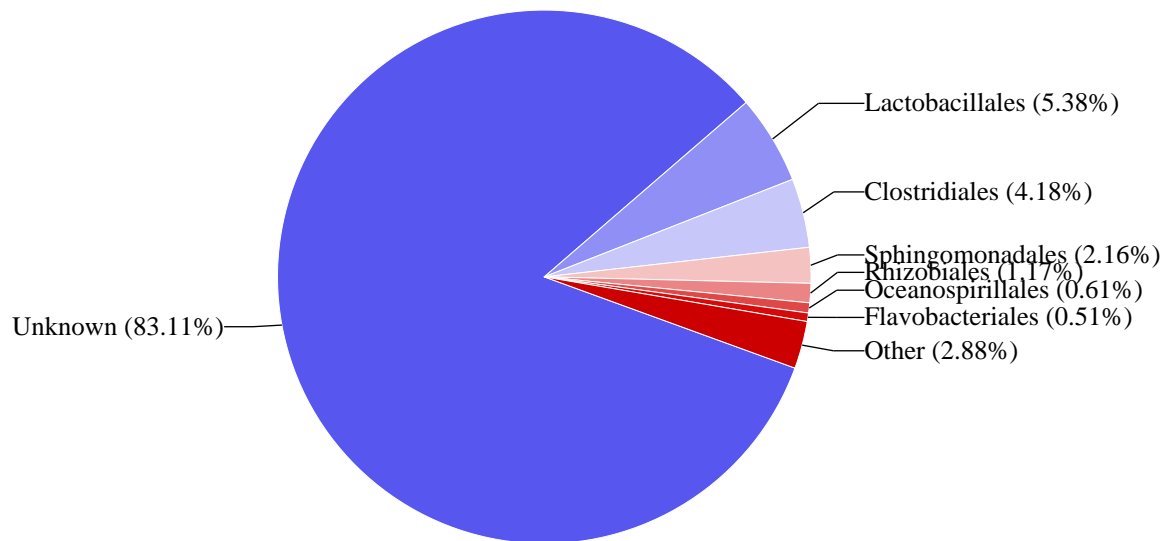

## Family Classification

| Family               | Read Count | %     |
|----------------------|------------|-------|
| Unknown              | 75472.0    | 84.00 |
| Lactobacillaceae     | 4636.0     | 5.16  |
| Lachnospiraceae      | 3559.0     | 3.96  |
| Sphingomonadaceae    | 1885.0     | 2.10  |
| Methylobacteriaceae  | 958.0      | 1.07  |
| Endozoicimonaceae    | 549.0      | 0.61  |
| Flavobacteriaceae    | 308.0      | 0.34  |
| Enterobacteriaceae   | 216.0      | 0.24  |
| Pseudomonadaceae     | 187.0      | 0.21  |
| Comamonadaceae       | 167.0      | 0.19  |
| Methylophilaceae     | 144.0      | 0.16  |
| Alteromonadaceae     | 137.0      | 0.15  |
| Propionibacteriaceae | 123.0      | 0.14  |
| Bacillaceae          | 114.0      | 0.13  |
| Verrucomicrobiaceae  | 102.0      | 0.11  |
| Micrococcaceae       | 98.0       | 0.11  |
| Rhodobacteraceae     | 94.0       | 0.10  |
| Moraxellaceae        | 90.0       | 0.10  |
| Corynebacteriaceae   | 89.0       | 0.10  |
| Streptococcaceae     | 87.0       | 0.10  |
| Caulobacteraceae     | 72.0       | 0.08  |
| Bartonellaceae       | 69.0       | 0.08  |
| Pirellulaceae        | 55.0       | 0.06  |
| Piscirickettsiaceae  | 48.0       | 0.05  |
| Oscillatoriaceae     | 47.0       | 0.05  |
| Spirochaetaceae      | 46.0       | 0.05  |
| Rhodospirillaceae    | 43.0       | 0.05  |
| LD19                 | 41.0       | 0.05  |
| Aerococcaceae        | 39.0       | 0.04  |
| Actinosynnemataceae  | 32.0       | 0.04  |
| Phycisphaeraceae     | 31.0       | 0.03  |
| Erythrobacteraceae   | 28.0       | 0.03  |
| Saprospiraceae       | 27.0       | 0.03  |
| A4b                  | 24.0       | 0.03  |
| Phormidiaceae        | 24.0       | 0.03  |
| Cryomorphaceae       | 24.0       | 0.03  |
| Clostridiaceae       | 24.0       | 0.03  |
| Acetobacteraceae     | 23.0       | 0.03  |
| Burkholderiaceae     | 18.0       | 0.02  |

|                    |      |      |
|--------------------|------|------|
| Mycobacteriaceae   | 18.0 | 0.02 |
| Planococcaceae     | 17.0 | 0.02 |
| Vibrionaceae       | 16.0 | 0.02 |
| CV106              | 13.0 | 0.01 |
| Bacteroidaceae     | 12.0 | 0.01 |
| Chitinophagaceae   | 10.0 | 0.01 |
| Brevibacteriaceae  | 9.0  | 0.01 |
| Porphyromonadaceae | 9.0  | 0.01 |
| Rhodocyclaceae     | 9.0  | 0.01 |

Top Family Classification

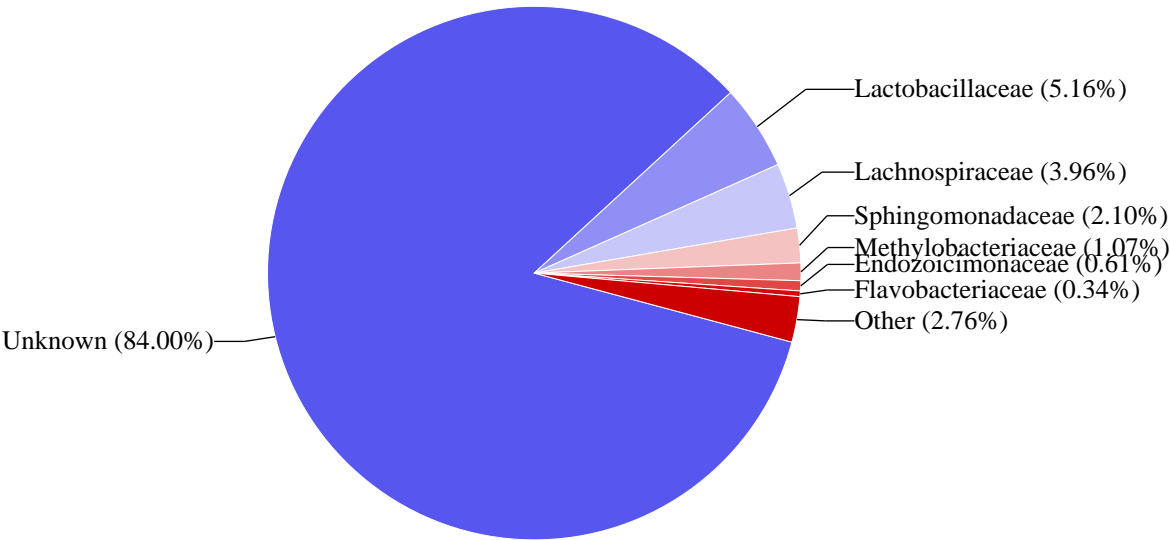



## Genus Classification

| Genus             | Read Count | %     |
|-------------------|------------|-------|
| Unknown           | 80717.0    | 89.87 |
| Lactobacillus     | 4605.0     | 5.13  |
| Sphingomonas      | 1847.0     | 2.06  |
| Methylobacterium  | 942.0      | 1.05  |
| Endozoicomonas    | 329.0      | 0.37  |
| Propionibacterium | 122.0      | 0.14  |
| Corynebacterium   | 89.0       | 0.10  |
| Acinetobacter     | 75.0       | 0.08  |
| Lyngbya           | 70.0       | 0.08  |
| Bartonella        | 69.0       | 0.08  |
| Brevundimonas     | 66.0       | 0.07  |
| Cloacibacterium   | 65.0       | 0.07  |
| Flavobacterium    | 64.0       | 0.07  |
| Streptococcus     | 58.0       | 0.06  |
| Bacillus          | 56.0       | 0.06  |
| Persicirhabdus    | 51.0       | 0.06  |
| Rubritalea        | 48.0       | 0.05  |
| Kocuria           | 46.0       | 0.05  |
| Tenacibaculum     | 46.0       | 0.05  |
| Spirochaeta       | 45.0       | 0.05  |
| Ascidianibacter   | 44.0       | 0.05  |
| Pseudomonas       | 42.0       | 0.05  |
| Facklamia         | 34.0       | 0.04  |
| Lactococcus       | 29.0       | 0.03  |
| Cryomorpha        | 24.0       | 0.03  |
| Acetobacter       | 19.0       | 0.02  |
| Alteromonas       | 18.0       | 0.02  |
| Burkholderia      | 18.0       | 0.02  |
| Mycobacterium     | 18.0       | 0.02  |
| Candidatus        | 17.0       | 0.02  |
| Anaerococcus      | 16.0       | 0.02  |
| Enterovibrio      | 16.0       | 0.02  |
| Ruegeria          | 15.0       | 0.02  |
| BD2               | 15.0       | 0.02  |
| Enhydrobacter     | 13.0       | 0.01  |
| Anaerospira       | 13.0       | 0.01  |
| Bacteroides       | 12.0       | 0.01  |
| Novosphingobium   | 12.0       | 0.01  |
| Brevibacterium    | 9.0        | 0.01  |
| Oceanobacillus    | 9.0        | 0.01  |
| Methyloversatilis | 9.0        | 0.01  |

## Top Genus Classification

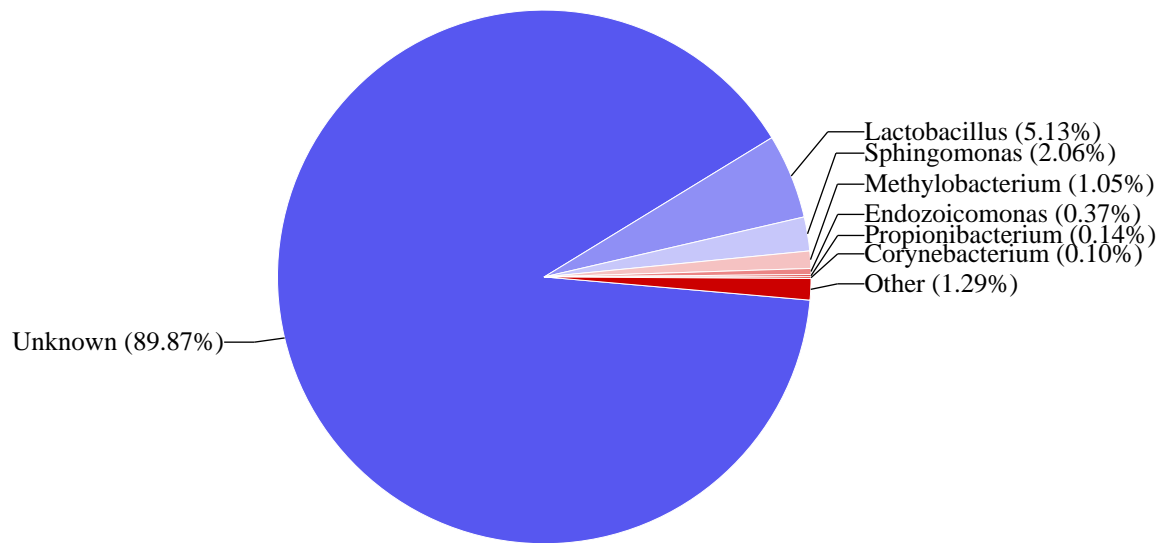

## Species Classification

| Species                      | Read Count | %     |
|------------------------------|------------|-------|
| Unknown                      | 87673.0    | 97.63 |
| Unknown_                     | 606.0      | 0.67  |
| Lactobacillus_hamsteri       | 493.0      | 0.55  |
| Lactobacillus_mucosae        | 264.0      | 0.29  |
| Cloacibacterium_             | 65.0       | 0.07  |
| Persicirhabdus_              | 51.0       | 0.06  |
| Acinetobacter_guillouiae     | 49.0       | 0.05  |
| Rubritalea_                  | 48.0       | 0.05  |
| Lyngbya_                     | 46.0       | 0.05  |
| Kocuria_palustris            | 46.0       | 0.05  |
| Tenacibaculum_               | 46.0       | 0.05  |
| Spirochaeta_                 | 45.0       | 0.05  |
| Ascidianibacter_aurantiacus  | 44.0       | 0.05  |
| Facklamia_                   | 34.0       | 0.04  |
| Lactococcus_                 | 29.0       | 0.03  |
| Methylobacterium_hispanicum  | 23.0       | 0.03  |
| Cryomorpha_                  | 23.0       | 0.03  |
| Propionibacterium_acnes      | 22.0       | 0.02  |
| Corynebacterium_             | 22.0       | 0.02  |
| Acinetobacter_lwoffii        | 21.0       | 0.02  |
| Lactobacillus_manihotivorans | 19.0       | 0.02  |
| Alteromonas_macleodii        | 18.0       | 0.02  |
| Flavobacterium_              | 18.0       | 0.02  |
| Candidatus_                  | 17.0       | 0.02  |
| Anaerococcus_                | 16.0       | 0.02  |
| BD2_                         | 15.0       | 0.02  |
| Enhydrobacter_aerosaccus     | 13.0       | 0.01  |
| Anaerospira_hongkongensis    | 13.0       | 0.01  |
| Brevibacterium_              | 9.0        | 0.01  |
| Methyloversatilis_           | 9.0        | 0.01  |

## Top Species Classification

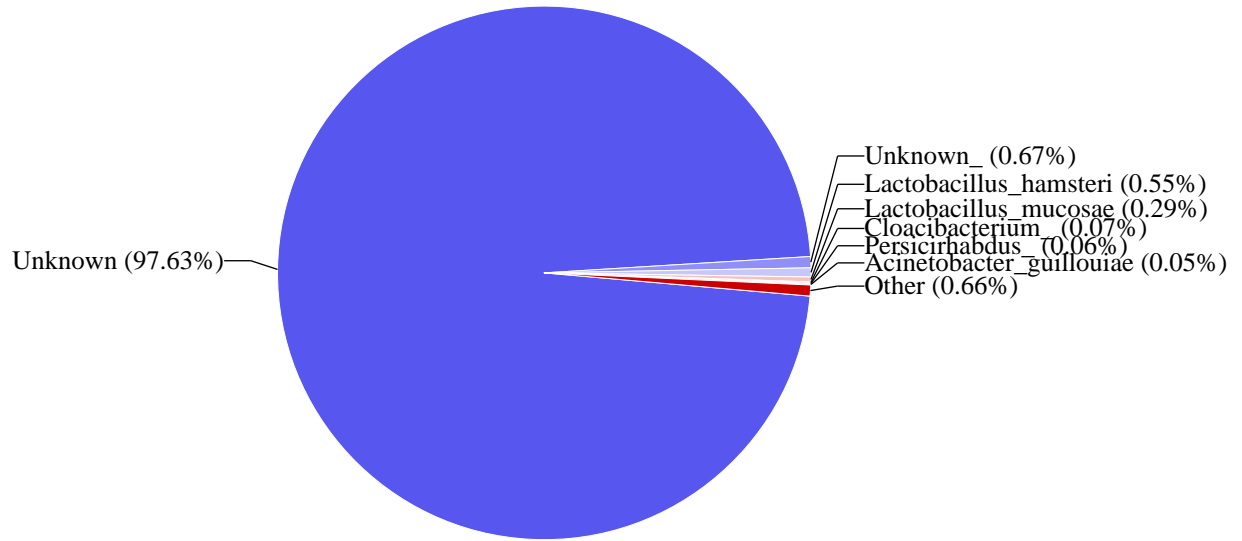

----- End of report -----
